1 **Structural dynamics of the functional nonameric Type III translocase export gate**

2

3 Biao Yuan<sup>1,2,3,4</sup>, Athina G. Portaliou<sup>1</sup>, Rinky Parakra<sup>1</sup>, Jochem H. Smit<sup>1,5</sup>, Jiri Wald<sup>2,3,4</sup>,  
4 Yichen Li<sup>5</sup>, Bindu Srinivasu<sup>1</sup>, Maria S. Loos<sup>1</sup>, Harveer Singh Dhupar<sup>6</sup>, Dirk Fahrenkamp<sup>2,3,4</sup>,  
5 Charalampos G. Kalodimos<sup>7</sup>, Franck Duong van Hoa<sup>6</sup>, Thorben Cordes<sup>5,8</sup>, Spyridoula  
6 Karamanou<sup>1</sup>, Thomas C. Marlovits<sup>2,3,4,9</sup> and Anastassios Economou<sup>1,9,10</sup>

7

8 <sup>1</sup> KU Leuven, Department of Microbiology and Immunology, Rega Institute for Medical  
9 Research, Laboratory of Molecular Bacteriology, B-3000 Leuven, Belgium

10 <sup>2</sup> Centre for Structural Systems Biology (CSSB), Notkestrasse 85, D-22607 Hamburg,  
11 Germany

12 <sup>3</sup> University Medical Center Hamburg-Eppendorf (UKE), Institute for Structural and Systems  
13 Biology, Notkestrasse 85, D-22607 Hamburg, Germany

14 <sup>4</sup> German Electron Synchrotron Centre (DESY), Notkestrasse 85, D-22607 Hamburg,  
15 Germany

16 <sup>5</sup> Molecular Microscopy Research Group, Zernike Institute for Advanced Materials,  
17 University of Groningen, Nijenborgh 4, 9747 AG Groningen, The Netherlands

18 <sup>6</sup> Department of Biochemistry and Molecular Biology, Faculty of Medicine, Life Sciences  
19 Institute, University of British Columbia, Vancouver, Canada

20 <sup>7</sup> Department of Structural Biology, St. Jude Children's Research Hospital, 263 Danny  
21 Thomas Place, Memphis, Tennessee 38105

22 <sup>8</sup> Physical and Synthetic Biology, Faculty of Biology, Ludwig Maximilians-Universität  
23 München, Großhadernerstr. 2-4, 82152 Planegg-Martinsried, Germany

24

25 <sup>9</sup>For correspondence: Anastassios Economou ([tassos.economou@kuleuven.be](mailto:tassos.economou@kuleuven.be))

26 Thomas C. Marlovits ([thomas.marlovits@cssb-hamburg.de](mailto:thomas.marlovits@cssb-hamburg.de))

27 <sup>10</sup> Lead contact

28

29 Character count incl. spaces: 44,236

30 Keywords: EPEC/ export apparatus/ Type III secretion/ SctV-C structure/ protein dynamics

31

32 **Abstract**

33 **Type III protein secretion is widespread in Gram-negative pathogens. It comprises the**  
34 **injectisome with a surface-exposed needle and an inner membrane translocase. The**  
35 **translocase contains the SctRSTU export channel enveloped by the export gate**  
36 **subunit SctV that binds chaperone/exported clients and forms a putative ante-**  
37 **chamber. We probed the assembly, function, structure and dynamics of SctV from**  
38 **enteropathogenic *E.coli* (EPEC). In both EPEC and *E.coli* lab strains, SctV forms**  
39 **peripheral oligomeric clusters that are detergent-extracted as homo-nonamers.**  
40 **Membrane-embedded SctV<sub>9</sub> is necessary and sufficient to act as a receptor for**  
41 **different chaperone/exported protein pairs with distinct C-domain binding sites that**  
42 **are essential for secretion. Negative staining electron microscopy revealed that**  
43 **peptidisc-reconstituted His-SctV<sub>9</sub> forms a tripartite particle of ~22 nm with a N-**  
44 **terminal domain connected by a short linker to a C-domain ring structure with a ~5**  
45 **nm-wide inner opening. The isolated C-domain ring was resolved with cryo-EM at 3.1**  
46 **Å and structurally compared to other SctV homologues. Its four sub-domains**  
47 **undergo a three-stage “pinching” motion. Hydrogen-deuterium exchange mass**  
48 **spectrometry revealed this to involve dynamic and rigid hinges and a hyper-flexible**  
49 **sub-domain that flips out of the ring periphery and binds chaperones on and between**  
50 **adjacent protomers. These motions are coincident with pore surface and ring entry**  
51 **mouth local conformational changes that are also modulated by the ATPase inner**  
52 **stalk. We propose a model that the intrinsic dynamics of the SctV protomer are**  
53 **modulated by chaperones and the ATPase and could affect allosterically the other**  
54 **subunits of the nonameric ring during secretion.**

55

56

57 **Word count: 250**

58 **Authors e-mail addresses:**

59 Biao Yuan: [biao.yuan@cssb-hamburg.de](mailto:biao.yuan@cssb-hamburg.de)

60 Athina G. Portaliou: [athina.portaliou@kuleuven.be](mailto:athina.portaliou@kuleuven.be)

61 Rinky Parakra: [rinky.parakra@kuleuven.be](mailto:rinky.parakra@kuleuven.be)

62 Jochem H. Smit: [jochem.smit@kuleuven.be](mailto:jochem.smit@kuleuven.be) ; ORCID: 0000-0002-3597-9429

63 Jiri Wald: [jiri.wald@cssb-hamburg.de](mailto:jiri.wald@cssb-hamburg.de)

64 Yichen Li: [yichen.li@rug.nl](mailto:yichen.li@rug.nl)

65 Bindu Srinivasu: [bindu.srinivasu@kuleuven.be](mailto:bindu.srinivasu@kuleuven.be) ; ORCID: 0000-0003-0875-2680

66 Maria S. Loos: [ms.mariam.ms@gmail.com](mailto:ms.mariam.ms@gmail.com)

67 Harveer Singh Dhupar: [harvirsinghdhupar@yahoo.com](mailto:harvirsinghdhupar@yahoo.com)

68 Dirk Fahrenkamp: [dirk.fahrenkamp@cssb-hamburg.de](mailto:dirk.fahrenkamp@cssb-hamburg.de)

69 Charalampos G. Kalodimos: [babis.kalodimos@stjude.org](mailto:babis.kalodimos@stjude.org)

70 Franck Duong van Hoa: [fduong@mail.ubc.ca](mailto:fduong@mail.ubc.ca)

71 Thorben Cordes: [cordes@bio.lmu.de](mailto:cordes@bio.lmu.de)

72 Spyridoula Karamanou: [lily.karamanou@kuleuven.be](mailto:lily.karamanou@kuleuven.be) ; ORCID: 0000-0002-8803-1404

73 Thomas C. Marlovits: [thomas.marlovits@cssb-hamburg.de](mailto:thomas.marlovits@cssb-hamburg.de)

74 Anastassios Economou: [tassos.economou@kuleuven.be](mailto:tassos.economou@kuleuven.be) ; ORCID: 0000-0002-1770-507X

75

76

## 77 INTRODUCTION

78 The type III protein secretion system (T3SS) is widely used by many Gram-negative  
79 pathogenic or symbiotic bacteria to inject proteins directly into the eukaryotic host cytoplasm  
80 (1, 2). T3SS comprises the "injectisome", a nano-syringe bridging the bacterial and  
81 eukaryotic cytoplasm. Injectisomes comprise four parts (Fig. 1A): a ~32-36 nm-long trans-  
82 envelope "basal body" composed of stacked rings; an inner membrane-embedded "export  
83 apparatus", located at the basal body base; a circular cytoplasmic sorting platform, including  
84 the ATPase complex, that protrudes ~28 nm into the cytoplasm and has a diameter of ~32  
85 nm and finally, a filamentous needle lying at the top of the injectisome, that protrudes from  
86 within the basal body to the extracellular milieu, and carries a "translocon" at its tip (2-5).  
87 Translocons form pores in host plasma membranes through which effectors are delivered  
88 (6).

89 The unifying nomenclature Sct (Secretion and cellular translocation) is used for the  
90 conserved components of the pathogenic/symbiotic injectisomes across bacteria (7,  
91 8)([www.stepdb.eu](http://www.stepdb.eu)). Species/genus suffixes in subscript are added here to denote Sct  
92 components from other bacteria (e.g. *sr*Sct for *Shigella flexneri*).

93 The export apparatus located centrally inside the injectisome is thought to be the  
94 translocase that mediates chaperone/exported client targeting, switching from one client  
95 class to another, client engagement and translocation through the secretion tunnel (2, 9,  
96 10). Five components (SctRSTU and V) of the translocase contain many hydrophobic  
97 transmembrane-like domains, which challenge structural characterization and functional  
98 definition. This is further complicated by the peripheral nature of the association of SctV  
99 with SctRST seen from cryo-ET analysis (3, 5, 11). SctV and U also contain large C-terminal  
100 cytoplasmic domains. The SctV export gate is a nonamer and its C-domain forms a large  
101 cytoplasmic ring with a ~5 nm vestibule connected to the N-terminal membrane part with

102 narrow stalks (12-15)(Fig. 1A). The isolated cytoplasmic domain of *Shigella flexneri*  $s_f$ SctV-  
103 C crystalized as a ring structure with an external diameter of 11-17 nm and a height from  
104 the membrane surface of ~5.5 nm (12, 16, 17). Similarly, the flagellar SctV(FliA)-C forms  
105 rings with an external diameter of  $10.1 \pm 0.6$  nm and a height of  $5.1 \pm 0.4$  nm (18-21). The  
106 C-terminal domain of  $EPEC$ SctV has been structurally resolved at 4.6 Å resolution using cryo-  
107 EM revealing that nonameric rings form via electrostatic interactions between subunits (14).  
108 The nonameric  $s_f$ SctV of *Salmonella typhimurium* has been determined using a high-  
109 throughput cryo-ET pipeline (16, 22). Such a cryo-ET model still lacks sufficient resolution  
110 to determine function and the assembly of its transmembrane channel formed around other  
111 subunits of the export apparatus by 72 transmembrane helices. Notably, the ATPase is  
112 located at a significant distance from SctV [ $\sim 5$  nm; (3, 5, 11)], but may connect to the SctV  
113 cytoplasmic ring indirectly through the elongated SctO inner stalk (23-27). Additional  
114 peripheral bridges formed by other components of the cytoplasmic sorting platform keep it  
115 in place juxtaposed to SctV even when the stalk is missing (3). The dynamics of  
116 ATPase/stalk/SctV C-domain during the translocation cycle remain unknown.

117 The monomeric cytoplasmic domains of SctV/FliAs(SctV-C/FliA-C) expressed as  
118 individual polypeptides interact with chaperone/exported protein complexes in solution (19,  
119 28, 29) with a low dissociation constant ( $K_d$ ) of  $\sim 20$   $\mu$ M (29). Chaperone/exported protein  
120 complexes also interact with the hexameric ATPase of the system in NMR-identified  
121 complexes (30) and with cytoplasmic platform components in pull-down experiments (26,  
122 31, 32). Although the order of chaperone/exported protein interactions with machinery  
123 components during secretion remains debatable, such interactions presumably attract  
124 exported substrates to SctV (9, 29). Then exported substrates dissociate from chaperones,  
125 diffuse to the SctV vestibule and to the inner membrane SctRSTU for export, via a putative  
126 channel running longitudinally through SctRST (10, 13, 33, 34). Recently, the first structure  
127 of an active export apparatus engaged with an exported protein in two functional states was

128 reported, revealing the complete 800 Å-long secretion conduit and unravelling its critical role  
129 in T3 secretion (13). However, export protein binding and trapping steps are poorly  
130 understood and the precise order and roles of the translocase components are unknown.

131 cryo-ET revealed that within the assembled injectisome,  $s_r$ SctRST sits on top of SctV  
132 in an inverted cone formation that is largely periplasmically exposed and only partially buried  
133 in the inner membrane plane (3, 13, 16). It is kept in this periplasmically protruding state  
134 apparently through contacts with the SctJ lipoprotein and lipids (3). A similar arrangement  
135 was seen in the flagellar T3S (33). The intricate formation of the injectisome rings would  
136 imply possible architectural dependence of one sub-structure on the other and perhaps  
137 suggest a temporal order of addition of each element. Nevertheless, deletion of *sctV* does  
138 not prevent the correct assembly of the remaining injectisome including that of the  
139 cytoplasmic sorting platform, the SctRST inverted cone, that should be internal to SctV ring,  
140 and the SctD that surrounds SctV externally (16, 22). Moreover, the injectisome can be  
141 purified with non-ionic detergents in stable structures in the apparent absence of SctV (13,  
142 15, 35, 36). These data suggested that assembly of SctV may retain a significant autonomy  
143 from that of the other architectural components.

144 Using the Gram-negative pathogen enteropathogenic *Escherichia coli* (EPEC), a  
145 serious diarrhea threat to children in developing countries (37), we recently reconstituted  
146 T3SS substrate membrane targeting process *in vitro* using inverted inner membrane  
147 vesicles (IMVs) harboring EPEC injectisomes. We revealed a novel mechanism that  
148 governs both membrane targeting of exported clients and switching from translocator  
149 (middle client) to effector (late client) export (9). We now focus on the assembly, structure,  
150 structural dynamics and receptor function of the export gate. We report that nonamers of  
151  $EPEC$ SctV and of its C-domain self-assemble *in vivo* in the absence of any other T3S  
152 components, with the C-domain having a major contribution to nonamerization. Membrane-  
153 embedded SctV<sub>9</sub> is necessary and sufficient to act as a functional receptor for

154 chaperone/exported protein complexes in the absence of ongoing secretion and/or other  
155 injectisome components. Specific patches on its C-domain are important for chaperone/  
156 exported protein complexes to bind as demonstrated using immobilized peptide arrays and  
157 confirmed with mutational analysis. The structure of the isolated C-domain polypeptide was  
158 resolved at 3.1 Å resolution by cryo-EM. Negative staining EM analysis indicates that  
159 peptidisc-reconstituted full-length His-SctV<sub>9</sub> is a two-domain particle connected by an  
160 equatorial constriction. Both peptidisc-reconstituted His-SctV<sub>9</sub> and cryo-EM-resolved C-  
161 domains showed nonameric rings with an internal pore of a ~5 nm diameter. Important  
162 contacts between the protomers are essential for C-domain nonamerization. The C-domain  
163 architecture revealed four sub-domains connected by linkers and compared to other  
164 homologue structures suggest that they undergo an “open” to “closed” “pinching motion.  
165 Hydrogen-deuterium exchange mass spectrometry revealed extensive local intrinsic  
166 dynamics in parts of the structure that would allow rigid body motions and rotations including  
167 those of the hyper-flexible sub-domain 2 (SD2) that is mainly responsible for the pinching  
168 motion. SD2 is a non-conserved structure that overlooks a deep groove that separates two  
169 adjacent protomers and forms a highly negatively charged ridge on either side of the groove.  
170 This landscape defines a wide, multi-valent chaperone trap with multiple binding patches  
171 that are essential for secretion. Direct contacts of the ATPase complex inner stalk SctO  
172 would modulate both local and domain dynamics.

173         These findings lay the foundations for mechanistic dissection of how structural  
174 dynamic states are coupled to T3S translocase-mediated secretion.

175

## 176 RESULTS

### 177 SctV forms multimeric clusters *in vivo*

178 To analyze SctV membrane assembly *in vivo*, we fused SctV to the C-terminus of  
179 eYFP and placed it under tetracycline promoter-control (anhydrotetracycline; AHT)(9).  
180 EPEC $\Delta$ sctV, a non-polar deletion strain, is similarly complemented *in vivo* by vector-borne  
181 sctV (Fig. S1A, lane 3), *eyfp-sctV* (lanes 5-6) and *his-sctV* (Fig S1B, lanes 6-8). eYFP-SctV  
182 assembles in distinct focal clusters in the cellular periphery detected by live-cell fluorescence  
183 microscopy (Fig. 1B), while eYFP alone shows widespread diffusion with no clusters (Fig.  
184 S1C).

185 To test if eYFP-SctV clustered assembly *in vivo* requires any other T3S components  
186 or if it self-assembles, we imaged the *E.coli* lab strain C41, that is devoid of an injectisome,  
187 carrying *eyfp-sctV*. C41/*eyfp-sctV* cells synthesized a similar amount of eYFP-SctV as  
188 EPEC $\Delta$ sctV/*eyfp-sctV* (Fig. S2A) that became visible after ~20 min (Fig. 1C; Fig. S2B). This  
189 presumably also encompasses the maturation time for the fluorophore (38). eYFP-SctV  
190 synthesized in C41, as in EPEC $\Delta$ sctV (Fig. 1B), also showed a distinct peripheral punctate  
191 staining (Fig. 1C). This indicated that the apparent eYFP-SctV clustering *in vivo* is an  
192 inherent property of SctV.

193 The punctate staining pattern of eYFP-SctV was characteristic and distinct from that  
194 of other fluorescent fusion protein markers that showed either diffuse staining all over the  
195 cytoplasm (eYFP) or peripheral staining but of similar dispersed intensity [periplasmic TorA  
196 (39); outer membrane BamE (R. Ieva, unpublished) (Fig. S1C-E)]. eYFP-SctV foci  
197 fluoresced more strongly than the monomeric inner membrane protein LacY-eYFP (Fig.  
198 S1F)(40), suggesting that SctV self-assembles in higher order quaternary states in the inner  
199 membrane *in vivo* (see below). Analysis of 10,000-14,000 individual cells showing distinct  
200 clusters (Fig. S2B and C), revealed that commonly ~1-4 eYFP-SctV clusters are formed per  
201 EPEC $\Delta$ sctV/C41 cell (Fig. S2D) and are distributed along the cellular periphery (Fig. S2E).



202

## 203 **SctV natively extracted from membranes is nonameric**

204 To study the oligomeric state and assembly of SctV, we isolated EPEC membranes,  
205 treated them with various concentrations of the non-ionic detergent dodecyl-maltoside  
206 (DDM), separated the resulting complexes by blue native-polyacrylamide gel  
207 electrophoresis (BN-PAGE) and visualized them by immuno-staining with an antibody  
208 against the C-domain of SctV (Fig. 1D).

209 DDM concentrations  $\leq 0.7\%$  [w/v; 13.2 mM;  $\sim 80$ -fold above the critical micellar  
210 concentration ( $CMC_{H_2O} = 0.17$  mM)] did not solubilize discrete SctV-containing complexes  
211 (Fig. 1E, lane 2). At DDM concentrations  $\geq 1.0\%$ , the SctV-containing species migrated as  
212 a tighter band, with an apparent mass of  $\sim 700$  kDa, consistent with the mass of a stable  
213 nonamer (Fig. 1E, lanes 3-5).

214 When membranes were solubilized with 0.8% DDM, higher order SctV-containing  
215 complexes with apparent sizes of  $\sim 1$  MDa immuno-stained with  $\alpha$ -SctV-C (Fig. 1E, lane 6,  
216 bracket). These might be sub-assemblies of the injectisome [mass  $> 3$  MDa; at least 18  
217 different proteins (8, 35)]. When 0.8% DDM extracts were treated with additional DDM to a  
218 final concentration of 1.8%, a sharp band of SctV<sub>9</sub> was obtained (Fig. 1E, lane 7),  
219 suggesting that the assembled nonamer was a pre-existing component of the  $\sim 1$  MDa  
220 species. Elevated amounts of DDM likely dissociated all other partner subunits but left the  
221 SctV<sub>9</sub> intact.

222 These data suggested that full-length SctV in EPEC membranes assembles in stable,  
223 detergent-extractable, nonameric assemblies that easily dissociate from other injectisome  
224 components depending on detergent concentration.

225

## 226 **Self-assembly of SctV nonamers in membranes is injectisome-independent**

227 SctV might nonamerize on demand by enveloping existing membrane-embedded  
228 cores of SctRSTU or other injectisome components (22, 41-43). However, EPEC-derived  
229 SctV<sub>9</sub> is stable at up to 1.8% DDM (Fig. 1E) and SctV<sub>9</sub> forms clusters *in vivo* even in C41  
230 that is devoid of any injectisome components (Fig. 1C). This raised the possibility that SctV  
231 might self-assemble into nonamers in membranes.

232 To test this, we over-expressed the *sctV* gene behind a T7 promoter in C41 cells  
233 grown in LB medium (Fig. S3A, lane 3). The membranes were isolated and the membrane-  
234 embedded SctV complexes were characterized by BN-PAGE as above. At low DDM  
235 concentrations (0.4% DDM), C41 extracts contained negligible amounts of DDM-solubilized  
236 SctV (Fig. 1F, lane 2), while at DDM concentrations above 0.6%, discrete nonameric species  
237 of SctV of ~700 kDa were detected (Fig. 1F, lanes 3-7), similar in size to those seen in the  
238 EPEC-derived extracts (Fig. 1E, lanes 3-5). One visible difference though was that SctV<sub>9</sub>  
239 extraction from C41 membranes initiated at almost half the DDM concentration needed to  
240 extract it from EPEC membranes (Fig. 1F) suggesting that in EPEC, additional components  
241 may further stabilize membrane-embedded and assembled SctV<sub>9</sub>. The SctV<sub>9</sub> species can  
242 also be extracted with other non-ionic detergents (Fig. S3B), implying a stable, pre-existing,  
243 detergent-independent, oligomeric state. SctV<sub>9</sub> in C41 membranes was destabilized and  
244 aggregated by heat treatment (Fig. S3C) or once purified from membranes, dissociated into  
245 smaller complexes when treated with an ionic detergent (Fig. S3D), but was very stable at  
246 high concentrations of different non-ionic detergents (Fig. S3E and F).

247 SctV<sub>9</sub> may interact with additional injectisome components (16, 33). We tested  
248 directly whether the export apparatus components SctRSTU form complexes with SctV<sub>9</sub>.  
249 His-SctRSTU synthesized in C41, gives rise to a complex that is best extracted with 3.6%  
250 digitonin and has a mass of ~240kDa when analyzed by BN-PAGE and immuno-stained  
251 with  $\alpha$ -SctU C-domain antibody (Fig. 1G, lane 1). This apparent mass would be consistent  
252 with the R<sub>5</sub>:S<sub>4</sub>:T<sub>1</sub>:U<sub>1</sub> stoichiometry anticipated from cryo-EM and MS experiments (3, 10, 16,

253 33, 34). When co-synthesized with SctV in the same cells, a higher order species of >1MDa  
254 is observed at the low DDM concentration of 0.8% used (Fig. 1H, lane 4). This species runs  
255 as a diffuse band suggesting poor stability and increased dynamics. Once sequentially  
256 treated with 1.8% DDM (w/v) the nonameric species of SctV of ~700kDa appears as a  
257 prominent sharp band, indicating dissociation from other components (Fig. 1I, lane 2).

258 Collectively, these data suggested that SctV<sub>9</sub> stably self-nonamerizes in the absence  
259 of a scaffold provided by other T3S components but weakly associates with pre-assembled  
260 SctRSTU once the latter is present in the membrane.

261

### 262 **Contributions of the N- and C-terminal domains of SctV to its nonamerization**

263 SctV comprises a 34.8 kDa N-terminal domain with 8 predicted transmembrane  
264 helices connected by a short ~3 kDa linker to a 37.1 kDa C-terminal cytoplasmic domain.  
265 To determine which SctV segment is important for nonamerization, His-tagged N-terminal  
266 and C-terminal SctV fragments (Fig. 2A, top) were expressed in C41 and their  
267 oligomerization properties were compared to those of SctV after cytoplasmic and membrane  
268 extracts were fractionated by ultra-centrifugation.

269 Full-length SctV and SctV-N were mainly distributed in the membrane fraction, while  
270 most of SctV-C was detected in the cytosolic fraction (Fig. 2B, lanes 1-3). To exclude co-  
271 sedimentation with membranes due to aggregation and inclusion body formation, the  
272 membrane fraction was further washed with 8M Urea in two steps. Full-length SctV and  
273 SctV-N remained largely in the urea-insoluble membrane fraction (Fig. 2B, top and middle,  
274 lane 7), while SctV-C was extracted by urea completely (Fig. 2B, bottom, lane 7). We  
275 concluded that SctV-N can become membrane integrated in the presence or absence of the  
276 soluble C-domain. Membrane-embedded His-SctV-N extracted with detergent migrates  
277 diffusely at apparent masses of 200-500 kDa in BN-PAGE gels (Fig. 2C, lane 2, bracket),

278 that are discrete from those of SctV<sub>9</sub> (lane 1). This might imply formation of dynamic but  
279 unstable oligomers.

280 Next, we purified His-SctV-C by metal affinity chromatography and sucrose gradient  
281 ultra-centrifugation (Fig. S4A and B). His SctV-C had a mass of 384.3 ( $\pm$  3.5) kDa and a  
282 hydrodynamic (Stokes) diameter of 15.14 ( $\pm$  0.82) nm (shown by analytical gel permeation  
283 chromatography coupled to multi-angle and quasi-elastic light scattering detectors (GPC-  
284 MALS/QELS) (Fig. S4C) or 379.2 ( $\pm$  2.07) kDa (by native mass spectrometry; Fig. S4D).  
285 Both in good agreement to the theoretical mass of His-SctV-C<sub>9</sub> (374.9 kDa) indicating that  
286 the C-domain of SctV inherently self-nonamerizes.

287 To test the nonamer-promoting role of the C-domain in the context of the full-length  
288 SctV, we introduced different mutations in residues of SctV-C that lie at the protomer-  
289 protomer interface [(12, 14); see below]. In all cases, the mutations resulted in loss of the  
290 nonameric states of both the SctV-C (Fig. 2D; lane 2, one example shown; all mutants in  
291 Fig. S5A) and the SctV full length (Fig. 2E; lane 2, one example shown; all mutants in Fig.  
292 S5B). All oligomerization mutants were functionally defective in the secretion of either middle  
293 (Fig. 2F, lane 3, one example shown; all mutants in Fig. S5C) or late (lane 7 one example  
294 shown; all mutants in Fig. S5C) clients, indicating that self-nonamerization is essential for  
295 secretion and that several residues on the oligomerization surface have similar essential  
296 contributions to oligomerization.

297 We concluded that SctV-C has a strong tendency to self-nonamerize. This leads to  
298 nonamerization of the full-length SctV, perhaps aided by weak SctV-N oligomeric  
299 assemblies in the membrane.

300

301 **SctV<sub>9</sub> is a necessary and sufficient receptor for chaperone/exported client complexes**

302 SctV interacts with T3S chaperones with or without exported clients and/or the  
303 gatekeeper SctW (9, 29, 44). Nonamerization may be required for high affinity binding since

304 chaperone/exported substrate complexes bind with low affinity to monomeric flagellar SctV  
305 (29). To determine whether self-assembled SctV<sub>9</sub> is functional as an exported protein  
306 receptor, we probed its binding to the dimeric chaperone CesT alone or in complex with its  
307 cognate client Tir, using an *in vitro* affinity determination assay developed previously (9).  
308 IMVs were prepared from *E. coli* C41, harbouring either *sctV* on a plasmid or the empty  
309 vector and were urea-treated to strip away peripheral and non-specifically associated  
310 proteins. The external face of the IMVs corresponds to that of the cytoplasm in the cell; their  
311 lumen represents the periplasmic face. SctV<sub>9</sub>-containing, C41-derived IMVs were  
312 functionally competent for high affinity saturable binding of CesT or the CesT/Tir complex  
313 (Fig. 2G; Fig. S6A), with  $K_d$  values equivalent to those measured in IMVs from EPEC cells  
314 in the presence of the full complement of injectisome components [Fig. 2G; (9)]. In contrast,  
315 IMVs from C41 devoid of SctV showed only a linear, non-specific binding component that  
316 did not yield a measurable  $K_d$  (Fig. 2G; Fig. S6A). The receptor function of SctV was further  
317 corroborated using a second chaperone and chaperone/effector complex CesF/EspF (45)  
318 that also bound with high affinity to SctV-containing C41-derived IMVs, but not to C41-  
319 derived IMVs not containing SctV (Fig. 2G; Fig. S6B).

320 Chaperone/exported protein pairs are likely to share common receptor docking  
321 regions on the SctV<sub>9</sub> receptor (29). Attesting to this, incubation of excess of CesF chaperone  
322 (at concentrations of 10-fold  $K_d$ ) prevents the binding of CesT on IMVs prepared from  
323 C41/*sctV* and *vice versa* (Fig. 2G).

324 Chaperone/exported middle client complexes and the SctW gatekeeper bind to six  
325 different patches on the SctV C-domain determined using arrays of immobilized peptides  
326 (9). Using the same approach CesT, CesT/Tir, CesF, and CesF/EspF were shown to bind  
327 to patches  $\alpha$ - $\epsilon$  (Fig. S6C-E) that may be used in multi-valent binding (see below). IMVs  
328 prepared from C41 cells expressing *sctV* $\gamma$  were used as an example. SctV $\gamma$  formed  
329 nonamers as did the wild type (Fig. S5D, lanes 1 and 2) but showed a 3-4-fold affinity

330 reduction for CesT/Tir and CesF/EspF (Fig. 2G). All patches are functionally important  
331 beyond their *sensu stricto* receptor capacity for *in vivo* secretion of middle and late clients  
332 (9)(Fig. 2F, lanes 4 and 8, the  $\gamma$  derivative is completely defective).

333 We concluded that SctV<sub>9</sub> embedded in C41 membranes is necessary and sufficient  
334 to act as a high affinity receptor for T3S chaperone/exported client complexes *via* its  
335 cytoplasmic domain. The important mechanistic implication of this observation is that the  
336 receptor function of SctV neither depends on the presence of any other T3S components  
337 nor on ongoing translocation.

338

### 339 **Purified full length His-SctV<sub>9</sub> forms a ring structure**

340 To determine the ultrastructure of full-length SctV<sub>9</sub>, we synthesized His-SctV in C41.  
341 His-SctV forms nonamers like SctV (Fig. S1G, lanes 1 and 2), was extracted from  
342 membranes with 1.8% Triton X-100, and separated from higher order aggregates on a  
343 sucrose gradient (Fig. 3A and B; Fig. S4E). Fractions enriched in His-SctV<sub>9</sub> (determined by  
344 BN-PAGE; Fig. 3C) were collected, pooled and incubated with Ni<sup>2+</sup>-nitrilotriacetic acid (Ni<sup>2+</sup>-  
345 NTA) resin. Resin-bound His-SctV<sub>9</sub> assemblies were on-bead reconstituted into peptidiscs  
346 using 30% fluorescently labelled peptides (46). To probe if the peptidisc particles were  
347 indeed reconstituted in soluble states in the absence of detergent, we analysed them by  
348 clear native PAGE (CN-PAGE), which separates molecules on the basis of charge, mass  
349 and shape. Silver-stained CN-PAGE gels of His-SctV<sub>9</sub>-PR revealed a band of ~700-800 kDa  
350 (Fig. 3D) that was also fluorescent, indicating the presence of the bound solubilizing  
351 peptidisc peptides (Fig. 3E). GPC-MALS/QELS revealed that His-SctV<sub>9</sub>-PR has a mass of  
352  $762.8 \pm 6.9$  kDa (Fig. 3F, red) consistent with a nonameric species bound to ~17 solubilizing  
353 peptides of 4.5 kDa and a hydrodynamic diameter of  $22.0 \pm 0.98$  nm (Fig. 3F, blue) close to  
354 the anticipated dimensions derived from cryo-ET (16).

355 The His-SctV<sub>9</sub>-PR was analysed by negative staining EM (Fig. 3G, overview). Class  
356 averaged side views of individual His-SctV<sub>9</sub>-PR particles (Fig. 3G, bottom left) reveal that  
357 they comprise two distinct domains likely representing the membrane-embedded N-domain  
358 and cytoplasmic C-domain parts of SctV separated by a narrow constriction (9, 12, 16).  
359 Class averaged bottom views reveal a multimeric ring with an inner opening (Fig. 3G, bottom  
360 right).

361

### 362 **High resolution structure of the SctV C-terminal domain nonameric ring**

363 Repeated attempts to obtain a high-resolution structure of full length SctV failed to  
364 yield sufficient detail in the membrane part of the ring. We therefore focused our attention  
365 on the cytoplasmic domain. His-tagged SctV-C was purified and its structure determined  
366 using cryo-EM. Both single- and double-ringed species were observed in an approximately  
367 4:1 ratio and were sorted out by using a 3D classification in Relion 3.1 (Fig. S7A; Table S1).  
368 The reconstructed maps of the single-ringed particles with imposed C<sub>9</sub> symmetry and  
369 double-ringed particles with imposed D<sub>9</sub> symmetry were refined to 3.6 Å and 3.4 Å resolution,  
370 separately (Fig. S7A). The map of the single-rings (map1) is well aligned with parts of the  
371 double ringed map (map2) (Fig. S7B). Therefore, the double-ringed particles were  
372 subtracted into two single-ringed particles and combined with the single-ringed particle  
373 population. Thus, a final 3.1 Å map (map3) using 105,670 particles from 3739 micrographs  
374 was achieved (Fig. S7C-D). Local resolution regions of the EM map are consistent with  
375 predicted disordered regions (Fig. S6E). The model of the regions of 345-415, 462-583, and  
376 626-670 of SctV-C was obtained *de novo* from map3. While, the initial model of *sr*SctV-C<sub>9</sub>  
377 (PDB: 4a5p, 2x49) (12, 20) was used to guide the model building process for *EPEC*SctV-C  
378 (Fig. 4A).

379 The SctV-C<sub>9</sub> ring contains a charged pore lined with positively charged residues as  
380 are the two outer rims, close to the entry and exit mouths of the pore, at the cytoplasmic-

381 facing bottom and the membrane-facing top of the structure, respectively (Fig. S8A). The  
382 outer periphery of the ring is characterized by separated upper and bottom negatively  
383 charged bands. Significant conservation is seen in the residues that build the nonamer and  
384 line the inner ring pore (Fig. S8B). In contrast, outwardly facing peripheral surfaces of the  
385 ring are not conserved.

386 The SctV-C protomer is connected to the transmembrane N-domain by a linker (Fig.  
387 2A; 4B; S6E) and is built of four sub-domains (SD) connected by hinges. SD1 is  
388 discontinuous (aa353-415 and 463-483); SD2 (416-463) is inserted in SD1; SD3 (488-570  
389 and SD4 (571-676) [Fig. 4B; Fig. S6E and S8D (47)]. SD3 is the only domain that lines the  
390 narrowest constriction of the pore and nonamerizes the protomer and is the most conserved  
391 domain, as are some regions of SD1 and SD4 (Fig. S8B).

392 The nonamer assembles using an interprotomeric interface that is not extensively  
393 hydrophobic and includes multiple intermolecular electrostatic bridges that connect one sub-  
394 domain in one protomer A to a sub-domain in the adjacent protomer B, primarily through  
395 conserved residues in SD3-SD3 and SD3-SD1 contacts. These connect linker<sub>A</sub>-SD3<sub>B</sub>  
396 (S347-R532), SD1<sub>A</sub>-SD3<sub>B</sub> (E483/R564) and SD3<sub>A</sub>-SD3<sub>B</sub> (Q488-E503/Y501 and E489-R535)  
397 interfaces (Fig. S8C-G). Moreover, the SD1-SD3 hinge, is positioned between two  
398 protomers and may contribute to ring formation and conformational changes (47). All of  
399 these residues, except E503, were shown by mutagenesis to be crucial for nonamerization  
400 of both SctV-C and full length SctV (Fig. 2D and E; S5A and B; S8F and G) and for secretion  
401 (Fig. 2F; S5C). The oligomerization interface, provided primarily by SD3 residues (Fig. S8D),  
402 is the most conserved part of the protein (Fig. S8B). In contrast, the regions that are away  
403 from the ring pore formed by the conserved SD3, including the outwardly facing SD1 and 2  
404 and parts of SD4 are the least conserved.

405 The ring pore is built exclusively of SD3 contributed from the 9 subunits (Fig. 4C),  
406 with the highly conserved K506<sub>SD3</sub>, R510<sub>SD3</sub>, and K549<sub>SD3</sub> residues lining it (Fig. S8E) and



407 has a diameter of ~5nm. The cytoplasmic entry to the pore is built exclusively of SD4 that  
408 lines the pore entry with its 2 $\beta$ -tip (residues 594-604;  $\beta$ 11/12) that forms a hook-like  
409 protrusion (Fig. 4C). SD4 is recessed outwards relative to SD3, thus providing a wider,  
410 funnel-like entry mouth to the pore (Fig. 4C, entry funnel) with a diameter of ~8nm between  
411 hooks. On the other end, the exit mouth of the pore facing the membrane, widens out away  
412 over SD3, is built exclusively by SD1 and together with the top of SD3 form a wide exit mouth  
413 “ledge” (Fig. 4C, exit funnel). SD2 is unrelated to the pore and faces outwards. When a  
414 protomer is viewed head on in a side view of the ring, SD3 and SD4 have a near vertical  
415 placement, like barrel staves, while SD1/2 tilt leftward towards the adjacent subunit by ~30°  
416 from the vertical axis (Fig. 4D). This positioning creates large elongated grooves between  
417 the staves (Fig. 4D, dashed line) including the conserved residues R532<sub>SD3</sub>, E407<sub>SD1</sub> and  
418 R564<sub>SD3</sub> (Fig. S8B, middle) and also on either side of the ring “castle embrasures”, between  
419 adjacent SD4 domains on the entry funnel at the bottom and between SD1 domains at the  
420 exit funnel at the top(asterisks).

## 422 **Local structural dynamics of SctV-C<sub>9</sub> determined by HDX-MS**

423 Given that the same nonameric SctV ring changes its affinities for clients on the basis  
424 of associated protein regulators (9), we hypothesized that the intrinsic local dynamics of  
425 SctV may underlie its function. To test this, we used a hydrogen deuterium exchange mass  
426 spectrometry pipeline (HDX-MS; Fig. S9) which non-invasively monitors loss or gain of  
427 backbone H-bonds, commonly participating in secondary structure. The labeling reaction is  
428 at low micromolar concentrations and at physiological buffers (48-50). SctV-C was diluted  
429 to ~5  $\mu$ M into D<sub>2</sub>O buffer for various time-points. Samples were acid-quenched, protease-  
430 digested and D-uptake was determined. 233 peptides with good signal/noise ratio yielded  
431 ~99.7% primary sequence coverage (Table S2). The D-uptake for a tandem array of  
432 peptides that cover all of the sequence was expressed as a percentage of each one’s fully

433 deuterated control (taken as 100%) (Fig. 4E). Dynamics data are subsequently used to  
434 derive Gibbs free energy of exchange ( $\Delta G_{\text{ex}}$ , kJ mol<sup>-1</sup>) per residue of a protein's sequence  
435 using our in-house software PyHDX (Fig. 4F)(51, 52).  $\Delta G_{\text{ex}}$  is inversely correlated to the  
436 degree of dynamics in the protein backbone, therefore lower  $\Delta G_{\text{ex}}$  values represent higher  
437 backbone flexibility.

438 SctV-C displays significant dynamics including regions yielding lower resolution in  
439 the cryo-EM structure and predicted to contain disordered sequence (Fig. S6E; S7D). The  
440 highest level of dynamics is observed in the periphery of the ring (Fig. 4E and F, left and  
441 middle) and the hook at the entry funnel (right). In contrast, the pore and the exit funnel are  
442 rather rigid (Fig. 4E and F, left) as is a region next to the hook (Fig. 4E, middle and right).  
443 The observed elevated dynamics of the ring align along the ridges that flank the side groove,  
444 in which one elevated dynamics region of each protomer apposes the elevated dynamics  
445 region of the adjacent protomer (Fig. 4G).

446

#### 447 **Intrinsic local dynamics of the SctV-C protomer**

448 To gain insight in the regions of elevated dynamics and rigidity in the four sub-  
449 domains of the SctV protomer we mapped the HDX-MS data (Fig. 4E) onto a protomer  
450 structure derived from cryo-EM in ribbon representation (Fig. 5A). Highly dynamic residues  
451 are in red hues, while the less dynamic ones are in blue hues. SD2 displays the most  
452 elevated and SD3 the more reduced dynamics in the structure. The only regions of SD3 that  
453 display elevated dynamics are its connecting linker to SD4 (Fig. 5A.I, V572-T575) and a  
454 short connection between  $\alpha 5$  and  $\alpha 6$  (G513-I517) that faces the inner ring surface (Fig.  
455 5A.II). On the other hand, the hinge that connects SD3 to SD1 shows reduced dynamics  
456 (III). In addition to its intrinsic flexibility, SD2 is connected to SD1, into which it is rooted,  
457 using highly flexible loops connecting to the highly flexible ends of two secondary structure  
458 elements ( $\beta 4$  and  $\alpha 3$ ; IV) and this would greatly facilitate rigid body motions of SD2 around

459 this two-element hinge. The highly flexible  $\beta 4$  of SD1 participates in a 4-stranded sheet,  
460 displaying additional flexible regions (V), that face the side groove of the ring (Fig. 4G). SD4  
461 is rather rigid with three main internal regions of high dynamics: the hook ( $\beta 10$ - $\beta 11$ ; VI), the  
462 loop<sub>N604-R609</sub> (VII) and the extreme C-terminal region (I662-A676; VIII). These overall  
463 features were largely retained in the SctV monomer, obtained by analysing the monomeric  
464 SctV(R535A) derivative. Some regions of the monomer displayed more enhanced (e.g.  
465 V477-L504 in SD3 that face the pore) and two more reduced (N345-L357 and D550-L554)  
466 dynamics (Fig. 5B). These differences were visualized in a differential uptake map where  
467 purple hues indicated enhanced rigidity and green hues enhanced dynamics (Fig. 5C).

468 This pattern of intrinsic dynamics of SctV-C yields several regions of the protein with  
469 residues that have very low  $\Delta G$  thresholds between open and closed states, explaining their  
470 flexibility (Fig. 5D, coloured circles). This pattern of flexibility was also corroborated by an  
471 orthogonal approach, normal mode analysis, in which low frequency vibrational states for  
472 the atoms of a protein can be derived using coarse grain models derived from PDB  
473 structures and calculating their possible displacement (Fig. 5D, magenta line) (53). In the  
474 context of the nonamer-embedded protomer, flexible regions are located exclusively in  
475 SD1,2 and 4 and are practically absent from SD3.

476

### 477 **Sub-domain motions in SctV-C**

478 Local dynamics in critical parts of a structure, as detected in Fig. 5A, B and D for  
479 SctV-C, are commonly accompanied by and permit domain motions (14, 27, 52). All  
480 available structures of SctV-C have been solved in slightly different domain arrangements  
481 revealing a repertoire of domain conformational states that can be acquired by the four sub-  
482 domains of the C-domain. These can be seen to broadly ranging from an “open” to a “closed”  
483 state (12, 14, 18, 27, 29), primarily determined by the motion of the hyper-flexible SD2. The  
484 SctV-C structure resolved here approaches the closed state but its SD2 is closer to its SD1

485 compared to other structures and its SD2 is more detached from SD4 than in the “closed”  
486 models. To visualize the inherent dynamics of the C-domain sub-domains in the context of  
487 the protomer and the nonamer, we modeled the potential transition motions from an open  
488 to a closed state of SctV-C homologues into a movie (Fig. 5A; Movie S1).

489 The main rigid body motions modelled are those of the SD2 which makes use of its  
490 hinge connecting it to SD1 (linkers between  $\beta 4$  and  $\beta 5$  and  $\beta 8$  and  $\alpha 3$ ; Fig. 5A.IV; E, left;  
491 S6E) to extend outwards from the ring periphery to yield an “open” state and then retracts  
492 to an “intermediate” position, resting its  $2\beta$ -tip<sub>SD2</sub> (residues 433-444;  $\beta 6/7$ ) against SD1 and  
493 a flexible loop (residues 423-429; IX) against the C-terminus of SD4. This retraction of SD2  
494 is coincident to a rigid body rotation of SD4 around its hinge with SD3 by  $\sim 30^\circ$  (Fig. 5E,  
495 middle). This brings the protruding hook/ $2\beta$ -tip<sub>SD4</sub> ( $\beta 10/11$ ; VI) to move towards SD3 and the  
496 inside of the pore. In a second step, SD1 undergoes a rigid body motion along its hinge with  
497 SD3 (Fig. 5E, right, III) and moves towards SD4. This displaces the  $2\beta$ -tip<sub>SD2</sub> which now  
498 moves towards the C-terminus of SD4, while the 423-429 loop of SD2 (IX) moves away from  
499 SD4. Concomitantly, the hook reverses its previous motion (Fig. 5E, right; Movie S1).

500 During the “pinching” motion of SD2 against SD4 in the ring periphery to yield the  
501 closed state, the inner ring surface and the diameter of the pore remain largely unchanged,  
502 except for individual charged and bulky residues of the inner ring side of SD3 (aa K500,  
503 N502, E503, K506, F543, K549; Fig. S8E).

504 Collectively, this modelling suggested possible rigid body domain transitions derived  
505 from the high-resolution structural snapshots of end states. Our HDX-MS data would now  
506 rationally explain these motions as resulting by the local dynamics of SctV-C and involving  
507 the hinges and the hyper-flexible SD2 (Fig. 5A; Movie S2). Rather than distinct stable  
508 “states”, the intrinsic dynamics analysis raises the more possibility of a conformational  
509 ensemble of states.

510

## 511 **SctV-C sub-domain dynamics are related to association of interactors**

512 Two main groups of SctV interactors have been analysed to date: chaperones with  
513 or without clients (24, 29, 47, 54) and the inner stalk subunit SctO of the ATPase complex  
514 (27). Binding of chaperone/client complexes occurs mainly in the periphery of the ring  
515 extending to the exit funnel. Binding sites determined by NMR and peptide arrays are  
516 located on either side of the side grooves of the ring (Fig. 6A; S6E; Movie S3). A prominent  
517 chaperone binding site (patches  $\alpha$  and  $\beta$ ; S6E) is the 4-stranded beta sheet of SD1 that  
518 forms a continuous surface with SD2 residues, with residues like (V393<sub>SD1</sub>, K411<sub>SD1</sub>,  
519 T413<sub>SD1</sub>, K436<sub>SD2</sub>, L437<sub>SD2</sub> in protomer B and apposed to H455<sub>SD2</sub>, I456<sub>SD2</sub> in protomer A;  
520 Fig. 6B, top) overlooking the side groove (Fig. 4F). The non-conserved and highly dynamic  
521 SD2 is a major site of chaperone binding on a single protomer but can also contribute binding  
522 interfaces for multivalent inter protomeric binding. Sub-domain motions affect the degree of  
523 exposure of the binding sites (Movie S3). Most patches and NMR binding sites also coincide  
524 wholly or partly with islands of high or very high flexibility, particularly on SD2 and SD1 (Fig.  
525 S6E). Mutagenesis of surface-exposed residues in several of these regions revealed that  
526 they all contribute to chaperone binding affinity and are all essential for secretion [patch  $\gamma$  as  
527 an example; Fig. 2F, lanes 4 and 8 and 2G;(9)].

528 SctO binds exclusively to SD4, almost vertically against the entry funnel of the ring  
529 [Fig. 6A;(27)] approaching it from the cytoplasm and inserting in sockets formed by the  
530 vertical walls of two adjacent SD4 domains and a flat roof provided by the bottom side of  
531 SD3 (Fig. 6 C; Movie S4). SctO binds on one side directly the SD4 hook of protomer A, and  
532 on the other SD4 residues of protomer B.

533

534 **DISCUSSION**

535           How injectisomes function remains elusive. With the development of *in vitro*  
536 reconstitution systems (9, 55), guidance from cryo-EM-derived structures and structural  
537 dynamics introduced here for the first time, this issue can now be systematically addressed,  
538 and assembly processes can be dissected away from functional ones (i.e. secretory client  
539 docking and translocation).

540           The assembly of the SctRSTU translocase and its SctV export gate are key to the  
541 initiation of the downstream export events (22, 42). A major mechanistic challenge for the  
542 assembly of all these subunits is that although they enter the membrane using the universal  
543 membrane-protein integration machineries (e.g. Sec/SRP, YidC), SctV needs to  
544 subsequently multimerize and be “plugged” by SctRSTU. While oligomerization in the  
545 presence of other injectisome components *in vivo* has been implied for  $\gamma_e$ SctV-eGFP (43),  
546 our experiments demonstrate that SctV self-assembles into functional nonamers, driven  
547 largely by its C-domain (Fig. 2C-D; S5A; S8), *in vivo* and *in vitro* even in cells that have no  
548 injectisome components. Therefore, nonamerization is an inherent SctV property. In the  
549 absence of SctV, the rest of the injectisome still assembles and SctRSTU acquires its  
550 periplasmically-exposed location inside the SctD/J rings (16, 22). Thus, SctV, perhaps pre-  
551 assembled, may arrive late to half-pre-assembled injectisomes into which it can integrate to  
552 meet SctRST (16). In EPEC, this may be simply a kinetically controlled stochastic event,  
553 through tight regulation of transcription and/or translation, given that SctV is synthesized in  
554 cells much later than SctRSTU (56).

555           SctV-C/FliA-C form nonameric rings in solution via electrostatic interactions (14, 34,  
556 57). Here with an improved map at 3.1 Å resolution we confirmed that multiple interfaces  
557 (Fig. S8C-G) are indeed involved in cytoplasmic ring assembly. Mutational analysis revealed  
558 that these contacts are all essential in forming the nonameric ring both in the isolated C-  
559 domain (Fig. 2D; S5A) and in the full-length protein (Fig. 2E; S5B), as is the interprotomeric

560 SD1-SD3 hinge involved in conformational changes (47)(Fig. S8C-G). Formation of the C-  
561 domain ring also leads to nonamerization and function of the full-length SctV, with a minor  
562 possible contribution from the transmembrane N-domain. The latter domain cannot be  
563 resolved well by cryo-EM in isolated SctV<sub>9</sub> (17, 21) presumably due to the absence of other  
564 T3SS components and/or lipids.

565 A significant body of data had implied that SctV possesses significant dynamics: the  
566 loss of nonamerization by single residue C-domain mutations (Fig. S5A-B), the reduced  
567 resolution in regions of the cryo-EM map, alternate domain states in the different SctV  
568 structures (12, 14, 47), the significant effects of patch mutations in both the affinity and the  
569 secretory function of SctV (Fig. 2F, G; S5C), the isolation of point mutants in SctV that mimic  
570 the effects of bound interactors (58), the ability of the ring to switch affinities (9) and be  
571 influenced by pH (17) and Ca<sup>2+</sup> ions (14). The local HDX-MS analysis performed here  
572 provided for the first-time residue level structural understanding of these dynamics (Fig. 4E;  
573 5A). It revealed the coexistence of a very rigid pore-building/nonamerizing sub-domain  
574 attached to two moderately dynamic domains that build the entry and the exit funnels of the  
575 pore. Moreover, it revealed a hyper-dynamic, non-conserved, outward facing sub-domain  
576 that controls chaperone access to the ring periphery. Flexible and inflexible hinges between  
577 the sub-domains and flexible elements like the entry funnel hook and the inner pore exposed  
578 dynamic region of SD3 (Fig. 5A) suggest possibilities for motions and functional roles. In  
579 common with multiple other examples (59-61), the dynamics described here are intrinsic,  
580 and reflect an inherent property of the monomeric polypeptide (Fig. 5B). As such, their  
581 exploitation by binding ligands does not require high energy input.

582 Our data corroborated and extended the major role of SctV as a chaperone/exported  
583 client receptor (9, 29), via its C-domain. T3SS chaperones are structurally distinct and  
584 flexible and atomistic detail of their binding in the context of the SctV nonamer is missing.  
585 Nevertheless, localization of binding interfaces on the SctV-C<sub>9</sub>, hints to important functional

586 regions made available between adjacent protomers, in the context of the nonamer (Fig. 6A  
587 and B, light green; Movie S3). Several residues in these regions are important for  
588 chaperone/gatekeeper binding in structures solved by NMR (29) and in genetic analyses  
589 (23, 24, 62-64)(Fig. S6E; green; Table S3). Using different T3SS-chaperones we  
590 demonstrated that binding sites on SctV-C are universal and shared (Fig. 2G). The absence  
591 of conservation, charged surfaces with excessive dynamics would allow the hyper-flexible  
592 SD2 to co-evolve to specifically bind the multiple different T3SS chaperones of a particular  
593 organism. The rather flat nature of this receptor landscape and its dynamics make it  
594 structurally feasible to accommodate very large chaperone/client complexes, while dimeric  
595 chaperones and/or clients may additionally secure docking on multiple regions of adjacent  
596 protomers. NMR structures suggested that chaperone complexes insert their binding  
597 elements inside both the side groove of the ring but also in the crevice between SD2-SD4  
598 uncovered when SD2 moves outward to the open state [(29); Fig. 6B, red arrow]. SD2  
599 interactions with chaperones may also control their release or accessibility since chaperone  
600 binding sites are hidden when SD2 retracts (Movie S3, green) (14, 27).

601 The identified chaperone binding regions on SctV-C have important mechanistic  
602 implications as they demonstrate that while targeting and subsequent secretion are  
603 structurally and biochemically separable, these processes must also be somehow coupled  
604 since when the receptor site  $\gamma$  is mutated alone, it leads to a modest reduction in affinity but  
605 completely abrogates secretion [Fig. 2F-G; (9)].

606 Multiple limited area binding sites on receptors, dynamic non-folded polypeptides and  
607 excessive dynamics are common themes in chaperone-non-folded client recognition and  
608 delivery systems (52, 65, 66). Multi-valent binding secures synergistic low nM affinities, from  
609 binding sites that individually possess only  $\mu$ M binding strength and the non-folded client  
610 does not face a severe entropic penalty when bound as it retains most of its sequence  
611 unstructured. A powerful mechanistic reason for these evolutionary choices is their facile



612 loss of the nM binding for the chaperone and/or client and the release of the latter by minor  
613 conformational modulation of the receptor. This “disruptive” role is anticipated here to be  
614 played by the SctO inner stalk of the ATPase since it penetrates between two adjacent SctV-  
615 C subunits at SD4 and binds the hook [Fig. 6C; (27)] and will undoubtedly affect the intrinsic  
616 dynamics of both subunits and the wider ring. Moreover, SctO binding might stabilize the  
617 SD2 open state [MovieS4; (27)]. As the machinery has nine binding sites for SctO and  
618 chaperone/clients but only one SctO subunit attached to one hexameric ATPase, a rotary  
619 mechanism would disrupt consecutively bound multiple chaperone/client complexes.  
620 Because the receptor is intrinsically dynamic, the ATP expenditure for client release may be  
621 minor.

622 Future analysis will be necessary to dissect the structural basis of these events and  
623 define the path that the exported clients follow upon their dissociation from their chaperones.  
624 As SD2 retraction coincides with SD4 hook rotation towards the central pore, this motion of  
625 and those of highly conserved pore-lining residues K506<sub>SD3</sub>, R510<sub>SD3</sub> and K549<sub>SD3</sub>, might  
626 also guide and translocate clients into the pore (Fig. S8 D and E; Movie S1). Both the hook  
627 and the conserved pore-lining residues affect substrate switching (17). The development  
628 here of tools like the peptidisc-reconstituted SctV<sub>9</sub> pave the way for functional reconstitution  
629 of the inner membrane translocase to decipher translocase mechanism and dynamics.

630

## 631 **Materials and Methods**

632 For the complete list of strains, plasmids, mutants, primers, buffers, antibodies, see  
633 the supplementary material.

## 634 635 **Cell growth, induction of gene expression, *in vivo* secretion**

636 EPEC strains were grown in the optimized M9 medium (67) (37°C; 6 h). Plasmid gene  
637 expression was induced from the tetracycline promoter (OD<sub>600</sub>=0.3; AHT; 2.5 ng/mL; 3 h or  
638 as indicated). Cells were harvested (5,000 x g; 20 min; 4°C; Sigma 3-16KL; rotor 11180);  
639 the spent medium was TCA-precipitated (20% w/v) and resuspended with 50 mM Tris-HCl  
640 (pH 8.0) in volumes adjusted according to OD<sub>600</sub>. An equal number of cells or supernatant  
641 volumes derived from an equal number of bacterial cells, were analyzed by SDS-PAGE, and  
642 immuno- or Coomassie Blue- stained.

## 643 644 **Live-cell imaging**

645 Cells were imaged on inverted fluorescence microscope (Olympus IX-83) with a 1.49  
646 NA oil-immersion objective (Olympus UAPON 100x) and ET442/514/561 Laser triple band  
647 set filtercube (69904, Chroma). The excitation light was provided by a 514 nm laser  
648 (Sapphire LP, Coherent) and the fluorescence emission was collected on an EM-CCD  
649 Camera (Hamamatsu C9100-13). Camera frames were collected using CellSens software  
650 (Olympus) for multi-position acquisition. Brightfield images were flattened by subtracting  
651 dark offset and dividing by an empty brightfield image. Fluorescence image were corrected  
652 for illumination beam profile and dark count. The brightfield images are segmented to identify  
653 cell positions by convolutional neural networks with the U-Net architecture (68-70). Next,  
654 individual cells were analyzed with the software ColiCoords (71). Binary objects from  
655 segmented images were filtered based on morphological features (size, ellipse axis) to  
656 select only single planktonic *E. coli* cells. Next, the obtained cell objects were further filtered

657 in consecutive steps 1) Shape of the binary image; 2) radius of the cell measured from the  
658 brightfield image (C41;  $280 \text{ nm} \leq r \leq 437 \text{ nm}$ , EPEC;  $467 \text{ nm} \leq r \leq 568 \text{ nm}$ ); 3) shape of  
659 the brightfield image radial distribution; 4) fluorescence intensity, which resulted in removal  
660 of out-of-focus cells and overexpressing cells. To localize fluorescent foci, first the cytosolic  
661 background was obtained by filtering the images with a spatial median filter (72) (kernel size  
662 5 pixels). Foci were identified in the background-subtracted images by a local maximum  
663 filter (73). To remove aggregates and inclusion bodies from the identified peaks, the Zernike  
664 moments (74) for each peak were determined ( $R_2^0$ ), and by thresholding only Gaussian-  
665 shaped peaks were selected.

666

### 667 **Membrane solubilization and BN-PAGE analysis**

668 Cell pellets were resuspended in Buffer A supplemented with 1 mM  $\text{MgCl}_2$ , 2.5 mM  
669 PMSF, and 50 mg/mL DNase and lysed by using French press (1,000 psi; 6 passes). The  
670 unbroken cells were removed by centrifugation (3,000 x g; 4°C; 5 min; Sigma 3-16KL; rotor  
671 11180). The membrane fraction was pelleted down by high-speed centrifugation (100,000 x  
672 g; 4°C; 30 min; 45Ti rotor; Optima XPN-80, Beckman Coulter). The membrane pellet was  
673 resuspended in solubilization buffer, homogenized with a Dounce homogenizer to a final  
674 protein concentration of ~40 mg/mL. Membrane proteins were extracted by incubating with  
675 non-ionic detergent as indicated (4°C; 1 h). Following ultra-centrifugation (100,000 x g; 4°C;  
676 15 min; rotor TL-100; OptimaMax-XP, Beckman-Coulter), solubilized membrane protein  
677 samples (20 $\mu$ l extract with BN-PAGE loading buffer, 10% glycerol) were loaded on 3-12%  
678 gradient Bis-Tris NativePAGE™ precast protein gels (Invitrogen) and subjected to BN-  
679 PAGE electrophoresis as described previously (75) with little modification. BN-PAGE  
680 electrophoresis was performed with anode buffer and cathode buffer 1 using XCell™  
681 *SureLock*™ Mini-Cell (approximately 2.5 hours, 4°C, 100V) until the blue running front has

682 moved about one-third of gel. Then cathode buffer 1 was replaced with cathode buffer 2 for  
683 electrophoresis (15 hours, 4°C, 70V).

#### 684 **Reconstitution of His-SctV<sub>9</sub> in peptidiscs**

685 The peptidisc reconstitution of His-SctV was conducted 'on-bead' as described  
686 previously (46) with some modifications. Crude membrane suspensions were derived from  
687 C41 cells overexpressing His-sctV by French press (6 passes; 1,000 psi; pre-cooled with  
688 ice). A total of 10 mL suspension (200 mg/mL) was mixed with 200 µl 100 x protease inhibitor  
689 cocktail solution (Sigma Aldrich, Cat. S8830), solubilized in Buffer F (supplemented with 1.8%  
690 Triton X-100) and incubated (1 h; 4°C). Insoluble aggregates were removed by  
691 centrifugation (20,000 x g, 30 min, 4°C; Sigma 1-16K). Solubilized membrane proteins (1  
692 mL; total of 400 mg) were loaded on a 30 mL 15-35% w/v linear sucrose gradient prepared  
693 as previously described (76). Sucrose solutions were made in Buffer G and 25 x 89 mm 38.5  
694 mL open-up polyallomer tubes were used (Beckman Coulter). Ultra-centrifugation was  
695 performed (160,000 x g; 16 hours; 4°C; SW 32 Ti rotor; Optima XPN-80, Beckman Coulter)  
696 and 1mL fractions were collected and analyzed by BN-PAGE. Fractions containing SctV<sub>9</sub>  
697 without higher order aggregates of SctV were selected and incubated with 1.5 mL of Ni<sup>2+</sup>-  
698 NTA resin (Qiagen) pre-equilibrated in Buffer F (6 h; 4°C). The Ni<sup>2+</sup>-NTA beads were  
699 transferred to a gravity column, washed with 100 column volumes (CV) of Buffer F  
700 supplemented with 0.9% Triton X-100 and 10 CV of Buffer H supplemented with 0.02%  
701 DDM, sequentially. Post-washing, 1 CV of Assembly Buffer conta

702 ining 0.8 mg/mL NSPr mix (1 fluorescent: 2 non-fluorescent NSPr; Peptidisc, an  
703 amphipathic bi-helical peptide; PEPTIDISC BIOTECH) in 20 mM Tris-HCl pH 8.0) was  
704 added to the beads and incubated (2 h; 4°C). Following washing with buffer H (10 CV), His-  
705 SctV<sub>9</sub>-PR was eluted in 0.5 mL fractions (5 mL of Buffer H + 300 mM imidazole). The elution  
706 fractions were loaded onto a Superose<sup>TM</sup>6 10/300 GL column previously equilibrated with

707 buffer L using an ÄKTA Pure system (GE Healthcare). The purified His-SctV<sub>9</sub>-PR Peptidisc  
708 complex was subsequently analyzed by negative-stain electron microscopy.

709

### 710 **Purification of His-SctV-C<sub>9</sub>**

711 BL21(DE3) cells overexpressing *his-sctV-C* were resuspended in buffer A and lysed  
712 by French press 1,000 psi; 5-6 passes; pre-cooled with ice). Insoluble material was removed  
713 by centrifugation (100,000 x g; 30 min; 4°C; 45 Ti rotor; Optima XPN-80; Beckman Coulter).  
714 The cell lysate supernatant was passed through a Ni<sup>+2</sup>-NTA resin column (Qiagen), and  
715 protein was purified following the manufacturer's instructions. Eluted His-SctV-C was loaded  
716 on a 13 mL 15-35% linear sucrose gradient and centrifuged (as described above). Fractions  
717 were loaded on 3-12% gradient Bis-Tris NativePAGE™ precast protein gels (Invitrogen) and  
718 subjected to CN-PAGE electrophoresis. CN-PAGE electrophoresis was performed using  
719 XCell™ SureLock™ Mini-Cell (approximately 15 hours, 4°C, 15 mA) and gels stained with  
720 Coomassie Blue. Fractions containing mainly His-SctV-C<sub>9</sub> were further purified on a  
721 Superdex200 10/300 GL column previously equilibrated with buffer M using an ÄKTA Pure  
722 system (GE Healthcare). His-SctV-C<sub>9</sub> complexes were subsequently analyzed by cryo-EM.

723

### 724 **Negative Staining and EM**

725 Sample preparations with the concentration of 20-100 ng/μl were applied to glow-  
726 discharged, carbon-coated copper grids, and stained with a 2% (wt/vol) solution of uranyl  
727 acetate, and examined under a FEI Talos L120C (120 KV) microscope equipped with a 4k  
728 × 4k Ceta™ 16M camera. The micrographs were acquired at 92,000X magnification with 2  
729 seconds exposure. Particle picking and 2D classification were performed using Relion  
730 3.1(77)

731

### 732 **Single-Particle cryo-EM and Data processing**

733 SctV-C was vitrified on Quantifoil 1.2/1.3. Briefly, 4  $\mu$ l of the sample was applied onto  
734 glow discharged grids and allowed to disperse for 0.5-2min. The grids were blotted for the  
735 4-7s set at 100% humidity and plunge-frozen in liquid propane/ethane mixture cooled with  
736 liquid nitrogen to about minus 180 -190 °C by using a Vitrobot Mark V. Vitrified specimen  
737 were imaged on a FEI Titan Krios operating at 300 kV and equipped with a field emission  
738 gun (XFEG) and a Gatan Bioquantum energy filter. Movies consisting of 25 frames were  
739 automatically recorded using FEI EPU software and the K2 Summit camera resulting in 0.55  
740 Å per physical pixel. For individual frames, an electron dose of 1.65 e<sup>-</sup>/Å<sup>2</sup> was used,  
741 corresponding to a cumulative electron dose of 41.25 e<sup>-</sup>/Å<sup>2</sup> equally distributed over a 5-sec  
742 movie. Movies were recorded at 0-4  $\mu$ m defocus. Samples for diameter measurements were  
743 recorded with LEGION13 on a FEI Polara (300 kV) equipped with a field emission gun  
744 (FEG) and a Gatan CCD Camera (UHS 4000). Single-particle reconstructions were  
745 performed using Relion 3.1 (77). 3739 Movies were motion-corrected, dose-weighted, and  
746 binned by 2. The CTF estimation of the resulting micrographs was determined using  
747 CTFFIND4 (78). Particles were picked from the motion-corrected micrographs using  
748 crYOLO (79) trained with a sub-set of manually picked particles. Particles were extracted  
749 into 256 x 256 boxes and subsequently binned by 2 for several rounds of 2D classification.  
750 A cleaned dataset was obtained by re-extraction and aligned to a rotationally averaged  
751 structure. 3D classification with C1 symmetry was performed to sort out the single-ringed  
752 particles and double-ringed particles. Focused refinements with applying C9 for single-  
753 ringed particles and D9 symmetry for double-ringed particles were performed. After  
754 converged refinements, per-particle CTF and Bayesian polishing were used to generate new  
755 data sets for another round of focused refinements. Overall gold-standard resolution: Fourier  
756 shell correlation (FSC=0.143) and local resolution were calculated with Relion3.1. The  
757 double-ringed particles were subtracted into two single-ringed particles and combined with  
758 single-ringed particles for the refinements for generating a better single-ringed map.

759

## 760 **Model building, refinement and validation**

761 Ab initio model building was performed with Coot (v0.9-beta)(80). Interactive refinement  
762 against the cryo-EM map density was performed with ISOLDE (v.1.1.0)(81), a molecular  
763 dynamics-guided structure refinement tool within in ChimeraX (v.1.1)(82). The resulting  
764 coordinate file was further refined with Phenix.real\_space\_refine (v.1.18-6831)(83) using  
765 reference model restraints, strict rotamer matching and disabled grid search. Model  
766 validation was carried out using MolProbity server (84) and EMRinger (85) within the Phenix  
767 software package. More details can be found in Table S1.

768

## 769 **SctV sub-domain motions analysis**

770

771 EPEC SctV-C was compared to its homologs with existing PDB files using ChimeraX 1.0  
772 (<https://www.rbvi.ucsf.edu/chimerax/>). The conformational states were then classified into  
773 different classes according to the distance between SD2 and SD4. Two models were  
774 generated after structural alignment using chimeraX 1.0 that had apparently the most  
775 extreme distances in the conformational states of SD2 and SD4. To build the open and close  
776 state of the EPEC SctV-C structural model we used SWISS-MODEL  
777 (<https://swissmodel.expasy.org/>) and PDB: 6wa6 *Chlamydia pneumoniae* and PDB: 2x49  
778 *Salmonella typhimurium* were chosen as the template for open and close state respectively.  
779 Then the open and close state of SctV-C, and the intermediate state of SctV-C obtained  
780 from cryo-EM here were morphed using ChimeraX to see how the sub-domains might move.  
781 The movie was recorded in ChimeraX and further processed using iMOVIE  
782 (<https://www.apple.com/imovie/>).

783

## 784 **HDX-MS experimental procedure, data collection and analysis**

785 *D exchange reaction and Quenching*

786 The purified SctV-C<sub>9</sub> protein was diluted to 5 μM for mass spectrometry experiments using  
787 H<sub>2</sub>O Buffer (25 mM Tris pH 8; 25 mM KCl). For HDX-MS experiments, 4 μl of SctV-C<sub>9</sub> in  
788 H<sub>2</sub>O buffer were mixed with 46 μl of the D<sub>2</sub>O buffer (25 mM Tris pD 7.6; 25 mM KCl) at 30°C  
789 and incubated at various time intervals (10s, 30 sec, 1min, 5 min, 10 min, 30 min, 100 min)  
790 before being added to 50 μl of quench solution (8M Urea; 0.1% DDM; 5 mM TCEP pH 2.5).  
791 A 100-μL Hamilton syringe was used for sample injection (100 μl). The mobile-phase flow  
792 paths were held at 0.5 °C using a three-valve unit (Trio Valve, Leap Technologies)  
793 constructed with a custom thermal chamber such that on-line protein-digestion, peptide  
794 desalting and reversed-phase HPLC separation are performed prior to infusion into the ESI  
795 ion source of the mass spectrometer. Loading of sample, digestion, and desalting (3 min)  
796 was driven with an isocratic HPLC pump (IPro-500, IRIS Technologies, Lawrence, KS) at a  
797 flow rate of 100 μL min<sup>-1</sup> through the 50-μL sample loop, the immobilized nepenthesin  
798 column (Affipro 2.1 mm ID x 20 mm length, Cat.No.: AP-PC-004), across a VanGuard C18  
799 Pre-column, (130 Å, 1.7 mm, 2.1 x 5 mm, Waters), and out to waste. After isolation of the  
800 enzyme column from the flow path, gradient elution from the trap across a C18 analytical  
801 column (130 Å, 1.7 mm, 1 x 100 mm, Waters) was carried out with a capillary-scale HPLC  
802 pump (Agilent 1100, Palo Alto, CA). The flow rate was held constant at 40 μL min<sup>-1</sup> while  
803 the composition of the mobile phase was increased from 0% ACN containing 0.23% (FA) to  
804 40% ACN containing 0.23% FA over 12 min gradient. Following gradient elution, mobile-  
805 phase composition was increased over a 1-min period to 90% ACN, 0.1% FA and held at  
806 that composition for 6 min prior to reduction over 1 min to 100% H<sub>2</sub>O, 0.1% FA. All HPLC  
807 connections were made with 1/16 in. x 0.05 in. PEEK tubing.

#### 808 *Peptide identification and HDX data analysis*

809 To map the peptides of SctV-C<sub>9</sub>, identification MS runs were performed, where 5 μM of  
810 protein in H<sub>2</sub>O buffer was used. The sample was quenched as described above and



811 analysed in the MS<sup>E</sup> acquisition mode in a SYNAPT G2 ESI-Q-TOF mass spectrometer over  
812 the m/z range 100-2,000 Da with the collision energy was ramped from 15 to 35 V.  
813 HDX-MS experiments were performed on SYNAPT G2 ESI-Q-TOF mass spectrometer  
814 using a capillary voltage 3.0 kV, sampling cone voltage 20 V, extraction cone voltage 3.6 V,  
815 source temperature 80°C, desolvation gas flow 500 L/h at 150°C. The primary sequence of  
816 SctV-C<sub>9</sub> as a search template was used to identify SctV-C<sub>9</sub> peptides identification using  
817 ProteinLynx Global Server (PLGS v3.0.1, Waters, UK). HDX experiments were then  
818 analyzed in Dynamx 3.0 (Waters, Milford MA) software. All the other parameters were as  
819 previously described (52). Full deuteration controls were obtained by incubating SctV-C<sub>9</sub> in  
820 D<sub>2</sub>O buffer overnight at 30°C. D-uptake (%) was calculated using the full deuteration control  
821 D-uptake values. The data has not been corrected for back exchange and is represented  
822 either as absolute D values or as a percent of the full deuteration control (86).

823

#### 824 **Gibbs free energy and normal mode analysis**

825 Gibbs free energy of local unfolding ( $\Delta G_{\text{ex}}$ , kJ mol<sup>-1</sup>) was determined assuming the  
826 Linderstrøm-Lang model of H/D exchange (87), using the PyHDX software (51). Normal  
827 modes of SctV were calculated using the WebNM@ web server (53), using the SctV cryo-  
828 EM structure as input (PDB XXX). Per-residue displacement was averaged across all protein  
829 chains and the first 6 non-trivial normal modes were summed with equal weights to obtain  
830 the final NMA displacement.

831

#### 832 **Miscellaneous**

833 *In vivo* protein secretion, IMVs preparation, peptide arrays, SEC-MALS- QELS analysis and  
834 determination of equilibrium dissociation constants ( $K_d$ ) were as described (9). The details of  
835 peptide array and  $K_d$  determination can be also found in supplementary methods. Ni<sup>2+</sup>-NTA  
836 purification was according to the manufacturer's instructions (Qiagen). Purification of

837 plasmids, PCR, digestion, and DNA fragments were done using Wizard® DNA Clean-Up  
838 System from Promega. DNA fragment ligation was done by using T4 DNA ligase as per the  
839 manufacturer's protocol (Promega). Sequencing of the genetic constructs was performed  
840 by Macrogen Europe. Oligos were synthesized by Eurogentec.

841

842

843

844 **ACCESSION NUMBERS:**

845 PDB: 7OSL

846 EMD-13054

847

848 **Authors' contributions:**

849 B.Y. performed *in vivo* and *in vitro* assays, molecular cloning, protein purification, GPC-  
850 MALS-QELS, reconstituted SctV in peptidiscs and performed negative staining, and cryo-  
851 EM data processing; A.G.P. performed molecular cloning, membrane binding assays,  
852 peptide array analysis, GPC-MALS, *in vivo* and *in vitro* assays; R.P. and S.K. performed  
853 HDX-MS experiments and analysis; Y.L. and J.S. performed live-cell imaging; J.S.  
854 performed and supervised free energy calculations of the HDX-MS data and developed  
855 analysis software; J.W. performed negative staining and cryo-EM data collection and  
856 processing, and analyzed data; D.F. built the atomic model; H.S.D. set up peptidisc  
857 reconstitution; B.S. performed native MS; M.S.L contributed in molecular cloning, antibody  
858 preparation, gene knockouts. S.K. trained, designed and supervised protein purification,  
859 detergent extraction and reconstitution, biochemical and biophysical experiments. T.C.M.  
860 supervised electron microscopy and structure determination experiments and analysis,  
861 C.G.K and T.C. contributed to data analysis, A.E., A.G.P., and B.Y. wrote the first draft of  
862 the paper with feedback from all the authors. A.E., T.C.M. and S.K. conceived and  
863 supervised the project.

864

865 **Acknowledgements**

866 We thank K. C. Tsois for preliminary SctV C-domain characterization and S.Krishnamurthy  
867 for help with analysis of HDX-MS data; C. Robinson (TorA-GFP), and R. Ieva (pDR*bamE-*  
868 *gfp*) for constructs. Work in our labs was supported by grants (to AE and TCM): T3RecS  
869 [#G002516N; Fonds Wetenschappelijk Onderzoek (FWO); <https://www.fwo.be/> and "I 2408-  
870 B22" from the Austrian Science Fund (FWF); <https://www.fwf.ac.at/en/>]; (to AE): DIP-BiD  
871 (#AKUL/15/40-G0H2116N; Hercules/FWO); RUN (#RUN/16/001 KU Leuven); the  
872 FWO/F.R.S.-FNRS "Excellence of Science - EOS" programme grant #30550343);  
873 PROFOUND (Protein folding/un-folding and dynamics; W002421N; WoG/FWO) and (to AE

874 and SK); C1 (FOscil; KU Leuven). This project was supported by funds through the Behörde  
875 für Wissenschaft, Forschung und Gleichstellung of the city of Hamburg available to TCM.  
876 B.Y. and Y.L. were Chinese Scholarship Council doctoral fellows. JHS is a PDM/KU Leuven  
877 fellow. The funders had no role in study design, data collection and analysis, decision to  
878 publish, or preparation of the manuscript. Image data processing has been performed at the  
879 German Electron Synchrotron Centre (DESY) using the High-Performance Computing  
880 Cluster.

881

### 882 **Data Availability**

883 All relevant data are within the manuscript and its Supporting Information files and are fully  
884 available without restriction. Coordinate and associated volume and metadata have been  
885 deposited in the PDB and EMDB respectively. SctV-C EMD-xxx / PDB xxx

886

### 887 **Competing interests**

888 The authors declare they have no competing financial interests or other conflicts of interest

889

## 890 References

- 891 1. Deng W, Marshall NC, Rowland JL, McCoy JM, Worrall LJ, Santos AS, et al. Assembly, structure,  
892 function and regulation of type III secretion systems. *Nature reviews Microbiology*. 2017.
- 893 2. Galán JE, Lara-Tejero M, Marlovits TC, Wagner SJ. Bacterial type III secretion systems:  
894 specialized nanomachines for protein delivery into target cells. 2014;68:415-38.
- 895 3. Hu J, Worrall LJ, Vuckovic M, Hong C, Deng W, Atkinson CE, et al. T3S injectisome needle complex  
896 structures in four distinct states reveal the basis of membrane coupling and assembly. *Nature microbiology*.  
897 2019.
- 898 4. Lara-Tejero M, Galán JE. The Injectisome, a Complex Nanomachine for Protein Injection into  
899 Mammalian Cells. 2019;8(2).
- 900 5. Butan C, Lara-Tejero M, Li W, Liu J, Galan JE. High-resolution view of the type III secretion export  
901 apparatus in situ reveals membrane remodeling and a secretion pathway. *Proceedings of the National*  
902 *Academy of Sciences of the United States of America*. 2019;116(49):24786-95.
- 903 6. Park D, Lara-Tejero M, Waxham MN, Li W, Hu B, Galán JE, et al. Visualization of the type III secretion  
904 mediated Salmonella–host cell interface using cryo-electron tomography. 2018;7:e39514.
- 905 7. Hueck CJ. Type III protein secretion systems in bacterial pathogens of animals and plants.  
906 *Microbiology and molecular biology reviews*. 1998;62(2):379-433.
- 907 8. Portaliou AG, Tsolis KC, Loos MS, Zorzini V, Economou A. Type III secretion: building and operating  
908 a remarkable nanomachine. *Trends in biochemical sciences*. 2016;41(2):175-89.
- 909 9. Portaliou AG, Tsolis KC, Loos MS, Balabanidou V, Rayo J, Tsirigotaki A, et al. Hierarchical protein  
910 targeting and secretion is controlled by an affinity switch in the type III secretion system of enteropathogenic  
911 *Escherichia coli*. *The EMBO journal*. 2017;36(23):3517-31.
- 912 10. Miletic S, Goessweiner-Mohr N, Marlovits TC. The Structure of the Type III Secretion System Needle  
913 Complex. *Current topics in microbiology and immunology*. 2020;427:67-90.
- 914 11. Berger C, Ravelli RBG, Lopez-Iglesias C, Kudryashev M, Diepold A, Peters PJ. Structure of the  
915 *Yersinia* injectisome in intracellular host cell phagosomes revealed by cryo FIB electron tomography. *Journal*  
916 *of structural biology*. 2021;213(1):107701.
- 917 12. Abrusci P, Vergara-Irigaray M, Johnson S, Beeby MD, Hendrixson DR, Roversi P, et al. Architecture  
918 of the major component of the type III secretion system export apparatus. *Nature structural & molecular*  
919 *biology*. 2013;20(1):99-104.
- 920 13. Sean Miletic DF, Nikolaus Goessweiner-Mohr, Jiri Wald, Maurice Pantel, Oliver Vesper, Vadim Kotov,  
921 Thomas C. Marlovits. Substrate-engaged type III secretion system structures reveal gating mechanism for  
922 unfolded protein translocation. *BioRxiv*. 2020.
- 923 14. Majewski DD, Lyons BJE, Atkinson CE, Strynadka NCJ. Cryo-EM analysis of the SctV cytosolic  
924 domain from the enteropathogenic *E. coli* T3SS injectisome. *Journal of structural biology*. 2020;212(3):107660.
- 925 15. Worrall LJ, Hu J, Strynadka NCJ. Aligning the Symmetry of the Type III Secretion System Needle  
926 Complex. *Journal of chemical information and modeling*. 2020;60(5):2430-5.
- 927 16. Butan C, Lara-Tejero M, Li W, Liu J, Galán JE. High-resolution view of the type III secretion export  
928 apparatus *in situ* reveals membrane remodeling and a secretion pathway. 2019:709592.
- 929 17. Matthews-Palmer TRS, Gonzalez-Rodriguez N, Calcra T, Lagercrantz S, Zachs T, Yu XJ, et al.  
930 Structure of the cytoplasmic domain of SctV (SsaV) from the *Salmonella* SPI-2 injectisome and implications  
931 for a pH sensing mechanism. *Journal of structural biology*. 2021;213(2):107729.
- 932 18. Terahara N, Inoue Y, Kodera N, Morimoto YV, Uchihashi T, Imada K, et al. Insight into structural  
933 remodeling of the FlhA ring responsible for bacterial flagellar type III protein export. *Science advances*.  
934 2018;4(4):eaao7054.
- 935 19. Saijo - Hamano Y, Imada K, Minamino T, Kihara M, Shimada M, Kitao A, et al. Structure of the  
936 cytoplasmic domain of FlhA and implication for flagellar type III protein export. *Molecular microbiology*.  
937 2010;76(1):260-8.
- 938 20. Worrall LJ, Vuckovic M, Strynadka NC. Crystal structure of the C - terminal domain of the *Salmonella*  
939 type III secretion system export apparatus protein InvA. *Protein Science*. 2010;19(5):1091-6.
- 940 21. Lucas Kuhlén SJ, Jerry Cao, Justin C. Deme, Susan M. Lea. Nonameric structures of the cytoplasmic  
941 domain of FlhA and SctV in the context of the full-length protein. *bioRxiv*. 2020.
- 942 22. van der Velde JHM, Oelerich J, Huang J, Smit JH, Jazi AA, Galiani S, et al. Corrigendum: A simple  
943 and versatile design concept for fluorophore derivatives with intramolecular photostabilization. *Nature*  
944 *communications*. 2017;8:16173.
- 945 23. Hara N, Morimoto YV, Kawamoto A, Namba K, Minamino T. Interaction of the extreme N-terminal  
946 region of FliH with FlhA is required for efficient bacterial flagellar protein export. 2012;194(19):5353-60.
- 947 24. Ibuki T, Uchida Y, Hironaka Y, Namba K, Imada K, Minamino T. Interaction between FliJ and  
948 FlhA, components of the bacterial flagellar type III export apparatus. 2013;195(3):466-73.
- 949 25. Lee P-C, Zmina SE, Stopford CM, Toska J, Rietsch AJ. Control of type III secretion activity  
950 and substrate specificity by the cytoplasmic regulator PcrG. 2014;111(19):E2027-E36.

- 951 26. Majewski DD, Worrall LJ, Hong C, Atkinson CE, Vuckovic M, Watanabe N, et al. Cryo-EM structure of  
952 the homohexameric T3SS ATPase-central stalk complex reveals rotary ATPase-like asymmetry.  
953 2019;10(1):626.
- 954 27. Jensen JL, Yamini S, Rietsch A, Spiller BW. "The structure of the Type III secretion system export  
955 gate with CdsO, an ATPase lever arm". PLoS pathogens. 2020;16(10):e1008923.
- 956 28. Bange G, Kümmerer N, Engel C, Bozkurt G, Wild K, Sinning I. FlhA provides the adaptor for  
957 coordinated delivery of late flagella building blocks to the type III secretion system. Proceedings of the National  
958 Academy of Sciences. 2010;107(25):11295-300.
- 959 29. Xing Q, Shi K, Portaliou A, Rossi P, Economou A, Kalodimos CG. Structures of chaperone-substrate  
960 complexes docked onto the export gate in a type III secretion system. Nature communications. 2018;9(1):1773.
- 961 30. Stefl S, Nishi H, Petukh M, Panchenko AR, Alexov E. Molecular mechanisms of disease-causing  
962 missense mutations. Journal of molecular biology. 2013;425(21):3919-36.
- 963 31. Romo-Castillo M, Andrade A, Espinosa N, Monjaras Feria J, Soto E, Diaz-Guerrero M, et al. EscO, a  
964 functional and structural analog of the flagellar FliJ protein, is a positive regulator of EscN ATPase activity of  
965 the enteropathogenic Escherichia coli injectisome. Journal of bacteriology. 2014;196(12):2227-41.
- 966 32. Blaylock B, Riordan KE, Missiakas DM, Schneewind O. Characterization of the Yersinia enterocolitica  
967 type III secretion ATPase YscN and its regulator, YscL. Journal of bacteriology. 2006;188(10):3525-34.
- 968 33. Kuhlen L, Abrusci P, Johnson S, Gault J, Deme J, Caesar J, et al. Structure of the core of the type III  
969 secretion system export apparatus. Nature structural & molecular biology. 2018;25(7):583-90.
- 970 34. Johnson S, Kuhlen L, Deme JC, Abrusci P, Lea SMJm. The Structure of an Injectisome Export Gate  
971 Demonstrates Conservation of Architecture in the Core Export Gate between Flagellar and Virulence Type III  
972 Secretion Systems. 2019;10(3):e00818-19.
- 973 35. Radics J, Königsmaier L, Marlovits TC. Structure of a pathogenic type 3 secretion system in action.  
974 Nature Structural and Molecular Biology. 2014;21(1):82.
- 975 36. Marlovits TC, Kubori T, Sukhan A, Thomas DR, Galan JE, Unger VM. Structural insights into the  
976 assembly of the type III secretion needle complex. Science. 2004;306(5698):1040-2.
- 977 37. Goosney DL, Gruenheid S, Finlay BBJAroc, biology d. Gut feelings: enteropathogenic E. coli (EPEC)  
978 interactions with the host. 2000;16(1):173-89.
- 979 38. Macdonald PJ, Chen Y, Mueller JD. Chromophore maturation and fluorescence fluctuation  
980 spectroscopy of fluorescent proteins in a cell-free expression system. Analytical biochemistry.  
981 2012;421(1):291-8.
- 982 39. Barrett CM, Ray N, Thomas JD, Robinson C, Bolhuis A. Quantitative export of a reporter protein, GFP,  
983 by the twin-arginine translocation pathway in Escherichia coli. Biochemical and biophysical research  
984 communications. 2003;304(2):279-84.
- 985 40. Robinson A, McDonald JP, Caldas VE, Patel M, Wood EA, Punter CM, et al. Regulation of mutagenic  
986 DNA polymerase V activation in space and time. 2015;11(8):e1005482.
- 987 41. Dietsche T, Mebrhatu MT, Brunner MJ, Abrusci P, Yan J, Franz-Wachtel M, et al. Structural and  
988 functional characterization of the bacterial type III secretion export apparatus. PLoS pathogens.  
989 2016;12(12):e1006071.
- 990 42. Wagner S, Königsmaier L, Lara-Tejero M, Lefebvre M, Marlovits TC, Galán JE. Organization and  
991 coordinated assembly of the type III secretion export apparatus. Proceedings of the National Academy of  
992 Sciences. 2010;107(41):17745-50.
- 993 43. Diepold A, Wiesand U, Cornelis GR. The assembly of the export apparatus (YscR, S, T, U, V) of the  
994 Yersinia type III secretion apparatus occurs independently of other structural components and involves the  
995 formation of an YscV oligomer. Molecular microbiology. 2011;82(2):502-14.
- 996 44. Gaytán MO, Monjarás Feria J, Soto E, Espinosa N, Benítez JM, Georgellis D, et al. Novel insights into  
997 the mechanism of SepL - mediated control of effector secretion in enteropathogenic Escherichia coli.  
998 MicrobiologyOpen. 2018;7(3):e00571.
- 999 45. Elliott SJ, O'Connell CB, Koutsouris A, Brinkley C, Donnenberg MS, Hecht G, et al. A gene from the  
1000 locus of enterocyte effacement that is required for enteropathogenic Escherichia coli to increase tight-junction  
1001 permeability encodes a chaperone for EspF. Infection and immunity. 2002;70(5):2271-7.
- 1002 46. Carlson ML, Young JW, Zhao Z, Fabre L, Jun D, Li J, et al. The Peptidisc, a simple method for  
1003 stabilizing membrane proteins in detergent-free solution. eLife. 2018;7:e34085.
- 1004 47. Inoue Y, Ogawa Y, Kinoshita M, Terahara N, Shimada M, Kodera N, et al. Structural Insights into the  
1005 Substrate Specificity Switch Mechanism of the Type III Protein Export Apparatus. Structure. 2019;27(6):965-  
1006 76 e6.
- 1007 48. Hu W, Walters BT, Kan ZY, Mayne L, Rosen LE, Marqusee S, et al. Stepwise protein folding at near  
1008 amino acid resolution by hydrogen exchange and mass spectrometry. Proceedings of the National Academy  
1009 of Sciences of the United States of America. 2013;110(19):7684-9.
- 1010 49. Brown KA, Wilson DJ. Bottom-up hydrogen deuterium exchange mass spectrometry: data analysis  
1011 and interpretation. Analyst. 2017;142(16):2874-86.
- 1012 50. Skinner JJ, Lim WK, Bedard S, Black BE, Englander SW. Protein hydrogen exchange: testing current  
1013 models. Protein Sci. 2012;21(7):987-95.

- 1014 51. Smit J.H. KS, Srinivasu B.,Y., Karamanou S., Economou A. PyHDX: Derivation and visualization of  
1015 protection factors from Hydrogen-Deuterium Exchange Mass Spectrometry at near residue resolution.  
1016 bioRxiv. 2020.
- 1017 52. Krishnamurthy S, Eleftheriadis, N., Karathanou, K., Smit, J., Portaliou, A., Chatzi, K., Karamanou,S.,  
1018 Bondar, N., Gouridis, G., and Economou, A. . A nexus of intrinsic dynamics underlies protein translocase  
1019 priming. *Structure*. 2021;in press.
- 1020 53. Tiwari SP, Fuglebakk E, Hollup SM, Skjærven L, Cragnolini T, Grindhaug SH, et al. WEBnm@ v2.0:  
1021 Web server and services for comparing protein flexibility. *BMC Bioinformatics*. 2014;15(1):427.
- 1022 54. Portaliou AG, Tsois KC, Loos MS, Balabanidou V, Rayo J, Tsigotaki A, et al. Hierarchical protein  
1023 targeting and secretion is controlled by an affinity switch in the type III secretion system of enteropathogenic  
1024 *Escherichia coli*. *EMBO J*. 2017;36(23):3517-31.
- 1025 55. Terashima H, Kawamoto A, Tatsumi C, Namba K, Minamino T, Imada K. In vitro reconstitution of  
1026 functional type III protein export and insights into flagellar assembly. *MBio*. 2018;9(3):e00988-18.
- 1027 56. Yerushalmi G, Litvak Y, Gur-Arie L, Rosenshine I. Dynamics of expression and maturation of the type  
1028 III secretion system of enteropathogenic *Escherichia coli*. *Journal of bacteriology*. 2014;196(15):2798-806.
- 1029 57. Kuhlen L, Johnson S, Zeitler A, Baurle S, Deme JC, Caesar JJE, et al. The substrate specificity switch  
1030 FlhB assembles onto the export gate to regulate type three secretion. *Nature communications*.  
1031 2020;11(1):1296.
- 1032 58. Yu XJ, Grabe GJ, Liu M, Mota LJ, Holden DW. SsaV Interacts with SsaL to Control the Translocon-  
1033 to-Effector Switch in the Salmonella SPI-2 Type Three Secretion System. *mBio*. 2018;9(5).
- 1034 59. Bhabha G, Biel JT, Fraser JS. Keep on moving: discovering and perturbing the conformational  
1035 dynamics of enzymes. *Accounts of chemical research*. 2015;48(2):423-30.
- 1036 60. Loutchko D, Flechsig H. Allosteric communication in molecular machines via information exchange:  
1037 what can be learned from dynamical modeling. *Biophysical reviews*. 2020;12(2):443-52.
- 1038 61. Zhang Y, Doruker P, Kaynak B, Zhang S, Krieger J, Li H, et al. Intrinsic dynamics is evolutionarily  
1039 optimized to enable allosteric behavior. *Current opinion in structural biology*. 2020;62:14-21.
- 1040 62. Hara N, Namba K, Minamino T. Genetic characterization of conserved charged residues in the  
1041 bacterial flagellar type III export protein FlhA. *PloS one*. 2011;6(7):e22417.
- 1042 63. Kinoshita M, Hara N, Imada K, Namba K, Minamino T. Interactions of bacterial flagellar chaperone-  
1043 substrate complexes with FlhA contribute to co-ordinating assembly of the flagellar filament. *Mol Microbiol*.  
1044 2013;90(6):1249-61.
- 1045 64. Minamino T, Kinoshita M, Hara N, Takeuchi S, Hida A, Koya S, et al. Interaction of a bacterial flagellar  
1046 chaperone FlgN with FlhA is required for efficient export of its cognate substrates. *Mol Microbiol*.  
1047 2012;83(4):775-88.
- 1048 65. Chatzi KE, Sardis MF, Tsigotaki A, Koukaki M, Sostaric N, Konijnenberg A, et al. Preprotein mature  
1049 domains contain translocase targeting signals that are essential for secretion. *The Journal of cell biology*.  
1050 2017;216(5):1357-69.
- 1051 66. Saio T, Guan X, Rossi P, Economou A, Kalodimos CG. Structural basis for protein antiaggregation  
1052 activity of the trigger factor chaperone. *Science*. 2014;344(6184):1250494.
- 1053 67. Yuan B, Economou A, Karamanou SJFML. Optimization of Type 3 protein secretion in  
1054 enteropathogenic *E. coli*. 2018.
- 1055 68. Long J, Shelhamer E, Darrell T, editors. Fully convolutional networks for semantic segmentation.  
1056 *Proceedings of the IEEE conference on computer vision and pattern recognition*; 2015.
- 1057 69. Martín Abadi AA, Paul Barham, Eugene Brevdo, Zhifeng Chen, Craig Citro, Greg S. Corrado, Andy  
1058 Davis, Jeffrey Dean, Matthieu Devin, Sanjay Ghemawat, Ian Goodfellow, Andrew Harp, Geoffrey Irving,  
1059 Michael Isard, Yangqing Jia, Rafal Jozefowicz, Lukasz Kaiser, Manjunath Kudlur, Josh Levenberg, Dan Mane,  
1060 Rajat Monga, Sherry Moore, Derek Murray, Chris Olah, Mike Schuster, Jonathon Shlens, Benoit Steiner, Ilya  
1061 Sutskever, Kunal Talwar, Paul Tucker, Vincent Vanhoucke, Vijay Vasudevan, Fernanda Viegas, Oriol Vinyals,  
1062 Pete Warden, Martin Wattenberg, Martin Wicke, Yuan Yu, Xiaoqiang Zheng. *TensorFlow: Large-Scale  
1063 Machine Learning on Heterogeneous Distributed Systems*. arXiv:160304467. 2016.
- 1064 70. Chollet F. <https://github.com/fchollet/keras>. Keras. 2015.
- 1065 71. Smit JH, Li Y, Warszawik EM, Herrmann A, Cordes T. ColiCoords: A Python package for the analysis  
1066 of bacterial fluorescence microscopy data. *PLoS One*. 2019;14(6):e0217524.
- 1067 72. Pauli Virtanen RG, Travis E. Oliphant, Matt Haberland, Tyler Reddy, David Cournapeau, Evgeni  
1068 Burovski, Pearu Peterson, Warren Weckesser, Jonathan Bright, Stéfan J. van der Walt, Matthew Brett, Joshua  
1069 Wilson, K. Jarrod Millman, Nikolay Mayorov, Andrew R. J. Nelson, Eric Jones, Robert Kern, Eric Larson, CJ  
1070 Carey, İlhan Polat, Yu Feng, Eric W. Moore, Jake VanderPlas, Denis Laxalde, Josef Perktold, Robert  
1071 Cimrman, Ian Henriksen, E.A. Quintero, Charles R Harris, Anne M. Archibald, Antônio H. Ribeiro, Fabian  
1072 Pedregosa, Paul van Mulbregt, and SciPy 1.0 Contributors. *SciPy 1.0—Fundamental Algorithms for Scientific  
1073 Computing in Python*. arXiv:190710121. 2019.
- 1074 73. Stéfan van der Walt JLS, Juan Nunez-Iglesias, François Boulogne, Joshua D. Warner, Neil Yager,  
1075 Emmanuelle Gouillart, Tony Yu and the scikit-image contributors. *scikit-image: Image processing in Python*.  
1076 *Peer Journal*. 2014.

- 1077 74. Coelho LP. Mahotas: Open source software for scriptable computer vision. *Journal of Open Research*  
1078 *Software*. 2013;1(1)(e3).
- 1079 75. Wittig I, Braun H-P, Schägger HJNp. Blue native PAGE. 2006;1(1):418.
- 1080 76. Stone AB. A simplified method for preparing sucrose gradients. *Biochemical Journal*. 1974;137(1):117.
- 1081 77. Zivanov J, Nakane T, Forsberg BO, Kimanius D, Hagen WJ, Lindahl E, et al. New tools for automated  
1082 high-resolution cryo-EM structure determination in RELION-3. *Elife*. 2018;7.
- 1083 78. Rohou A, Grigorieff N. CTFIND4: Fast and accurate defocus estimation from electron micrographs.  
1084 *Journal of structural biology*. 2015;192(2):216-21.
- 1085 79. Wagner T, Merino F, Stabrin M, Moriya T, Antoni C, Apelbaum A, et al. SPHIRE-crYOLO is a fast and  
1086 accurate fully automated particle picker for cryo-EM. *Communications biology*. 2019;2:218.
- 1087 80. Emsley P, Lohkamp B, Scott WG, Cowtan K. Features and development of Coot. *Acta*  
1088 *crystallographica Section D, Biological crystallography*. 2010;66(Pt 4):486-501.
- 1089 81. Croll TI. ISOLDE: a physically realistic environment for model building into low-resolution electron-  
1090 density maps. *Acta crystallographica Section D, Structural biology*. 2018;74(Pt 6):519-30.
- 1091 82. Pettersen EF, Goddard TD, Huang CC, Meng EC, Couch GS, Croll TI, et al. UCSF ChimeraX:  
1092 Structure visualization for researchers, educators, and developers. *Protein Sci*. 2021;30(1):70-82.
- 1093 83. Liebschner D, Afonine PV, Baker ML, Bunkoczi G, Chen VB, Croll TI, et al. Macromolecular structure  
1094 determination using X-rays, neutrons and electrons: recent developments in Phenix. *Acta crystallographica*  
1095 *Section D, Structural biology*. 2019;75(Pt 10):861-77.
- 1096 84. Williams CJ, Headd JJ, Moriarty NW, Prisant MG, Videau LL, Deis LN, et al. MolProbity: More and  
1097 better reference data for improved all-atom structure validation. *Protein Sci*. 2018;27(1):293-315.
- 1098 85. Barad BA, Echols N, Wang RY, Cheng Y, DiMaio F, Adams PD, et al. EMRinger: side chain-directed  
1099 model and map validation for 3D cryo-electron microscopy. *Nature methods*. 2015;12(10):943-6.
- 1100 86. Wales TE, Eggertson MJ, Engen JR. Considerations in the analysis of hydrogen exchange mass  
1101 spectrometry data. *Methods in molecular biology*. 2013;1007:263-88.
- 1102 87. Linderstrøm-Lang K. Deuterium exchange between peptides and water. *Chem Soc Spec Publ*.  
1103 1955;2:1-20.
- 1104
- 1105



1106

1107 **Figure legends**

1108 **Fig. 1. Subcellular localization of SctV and characterization of SctV nonamers**

1109 **A.** Cartoon representation of the EPEC injectisome. SctV<sub>9</sub> is shown in red.

1110 **B and C.** eYFP-SctV forms distinct foci in EPEC $\Delta$ sctV (**B**) and C41(**C**) cell peripheral. Scale  
1111 bar: 5  $\mu$ m; eYFP-sctV expression was induced with AHT: 20 ng/mL Representative images  
1112 from YFP and brightfield channel are shown;  $n=3$  biological replicates.

1113 **D:** Pipeline for SctV membrane complexes analysis by BN-PAGE. Following French press,  
1114 lysed cells were removed and membrane fractions were harvested by ultra-centrifugation.  
1115 Non-ionic detergents DDM was used to extract membrane proteins for further analysis by  
1116 BN-PAGE and immuno-staining with  $\alpha$ -SctV-C.

1117 **E.** BN-PAGE analysis of EPEC-derived, DDM-solubilized membrane complexes containing  
1118 SctV. Membrane proteins were extracted with different concentrations of DDM, analyzed by  
1119 BN-PAGE and  $\alpha$ -SctV-C immuno-staining (lanes 1-6).  $\sim$ 1 MDa species containing SctV  
1120 component was seen when extracted with 0.8% DDM (lane 6, bracket). A predominant  
1121  $\sim$ 700kDa species also appeared when extra DDM was added into 0.8% DDM sample (lane  
1122 7) migrating on the gel with the similar mass size as extractions with  $\sim$ 1.0% DDM (lanes 3-  
1123 5). Representative images are shown;  $n=3$

1124 **F.** As in E, DDM-solubilized membrane complexes derived from C41/ sctV cells. Membrane  
1125 proteins were extracted with different concentrations of DDM, analyzed by BN-PAGE and  
1126  $\alpha$ -SctV-C immuno-staining. Representative images are shown;  $n=3$

1127 **G** SctRSTU complex formation in C41 cells. BN-PAGE analysis of C41 or C41/sctRSTU,  
1128 Digitonin-solubilized membrane complexes and  $\alpha$ -SctU-C immuno-staining. A  
1129 representative image is shown;  $n=3$

1130 **H-I.** SctRSTU-V complex formation in C41 cells. Complexes derived from C41 cells carrying  
1131 compatible plasmids with sctV and sctRSTU (expressed as indicated) extracted with 0.8%

1132 DDM (**H**) or further treated with 1% DDM (**I**) and analyzed by BN-PAGE and  $\alpha$ -SctV-C  
1133 immuno-staining. Representative images are shown;  $n=3$

1134

1135 **Fig. 2. Analysis of SctV<sub>9</sub> as a functional receptor for chaperone/exported protein**  
1136 **complexes**

1137 **A.** Schematic representation of SctV transmembrane, linker and cytoplasmic domains (20)

1138 **B.** Sub-cellular localization of full length SctV and its sub-domains in C41 cells expressing  
1139 plasmid-borne SctV, SctV-N or SctV-C (Bottom panel). Following fractionation, equal  
1140 fraction volume was analyzed by 12% SDS-PAGE and immuno-staining. Tot: Total cell  
1141 lysate; Cyt: cytoplasmic fraction; Mem: Membrane fraction; Sol: Solubilized membrane  
1142 protein fraction. Representative images are shown;  $n=3$ .

1143 **C.** BN-PAGE analysis of His-SctV-N in C41. The membrane fraction of C41 cells expressing  
1144 plasmid-borne SctV or His-SctV-N was extracted with 1.8% DDM. Samples were analyzed  
1145 by BN-PAGE and immuno-staining with an  $\alpha$ -SctV-C or  $\alpha$ -His antibody (lanes 1 and 2,  
1146 respectively). Representative image is shown;  $n=3$

1147 **D.** The oligomerization states of SctV-C and its derivative. Purified SctV-C and one of its  
1148 interface disrupting mutants were analyzed by CN-PAGE and stained with Coomassie. SctV-  
1149 C mutant ERR: E503A-R535A-R564A; Representative images are shown;  $n=3$

1150 **E.** The oligomerization states of full-length SctV and its derivative. As in C, proteins from  
1151 membrane fractions derived from C41/*sctV* wt or mutated were extracted with 1.8% of DDM,  
1152 analyzed by BN-PAGE, and immuno-staining with  $\alpha$ -SctV-C. SctV mutant ERR: E503A-  
1153 R535A-R564A; Representative images are shown;  $n=6$ .

1154 **F.** Secretion of EspA and Tir from EPEC  $\Delta$ *sctV* cells carrying *sctV* wt or derivatives (as  
1155 indicated). Secreted protein amounts were quantified and secretion derived from EPEC  
1156  $\Delta$ *sctV*/*sctV* wt was considered 100%. SctV mutant ERR: E503A-R535A-R564A; SctV Patch  
1157  $\gamma$ -: DKITFLLKKL►GSIAVLLASS; All other values are expressed as % of this.  $n=3$ .

1158 **G.** Equilibrium dissociation constants ( $K_d$ ) of protein ligands for IMVs derived from C41 cells  
1159 with or without SctV or with SctV mutant (as indicated). The  $K_d$ s of CesT and CesF were  
1160 also determined for IMVs that had been pre-incubated with excess of CesF or CesT,  
1161 respectively (bottom); SctV Patch  $\gamma$ -: DKITFLKKL►GSIAVLLASS; mean values ( $\pm$  SEM)  
1162 are shown;  $n=6$ .

1163

### 1164 **Fig. 3. Full-length SctV purification, peptidisc reconstitution, and characterization**

1165 **A.** Pipeline of removal of SctV higher order aggregates and on-bead reconstitution into  
1166 peptidiscs (His-SctV<sub>9</sub>-PR) and purification. Crude membrane fraction of C41/*his-sctV<sub>9</sub>* cells,  
1167 following French press disruption and ultra-centrifugation, was treated with 1.8% v/v Triton  
1168 X-100 and loaded onto the 15%-35% sucrose gradient to separate His-SctV<sub>9</sub> from soluble  
1169 higher order aggregates.

1170 **B.** Sucrose gradient fractions containing His-SctV<sub>9</sub> without higher order aggregates were  
1171 analyzed by BN-PAGE and stained with Coomassie blue (representative image shown).  
1172 These fractions were used for further peptidisc reconstitution. Representative image is  
1173 shown;  $n=3$

1174 **C-E.** Validation of His-SctV<sub>9</sub>-PR reconstitution. His-SctV<sub>9</sub>-PR was analyzed by BN-PAGE  
1175 followed by Coomassie blue staining (**C**) and CN-PAGE followed by silver staining (**D**) and  
1176 fluorescence peptidisc detection (**E**). Representative images are shown;  $n=3$ .

1177 **F.** GPC-MALS/QELS analysis of His-SctV<sub>9</sub>-PR using Superose™ 6 (GE Healthcare). UV (in  
1178 black), mass traces (in red) and hydrodynamic diameter (in blue) of are shown.  $n=3$ .

1179 **G.** Negative staining EM analysis of His-SctV<sub>9</sub>-PR. Representative “overview” (upper panel;  
1180 scale bar: 50 nm) and “side” and “bottom views” of 2D class averages from His-SctV<sub>9</sub>-PR  
1181 are shown (lower panel; scale bar: 10 nm).

1182

### 1183 **Fig. 4 Structure and structural dynamics of SctV-C<sub>9</sub> using Cryo-EM and HDX-MS**

1184 **A.** Overviews of the nonameric SctV-C model. Different views of SctV-C<sub>9</sub> model were shown  
1185 with each protomer being differentially colored.

1186 **B.** Ribbon diagram indicating the sub-domains of SctV-C (SD; SD1: 353-415 and 463-483;  
1187 SD2:416-463; SD3: 488-570; SD4: 570-676). The protomer is shown in side view orientated  
1188 as the orange protomer in 4A, side view.

1189 **C.** Central cross-section showing the two-funnel-like transport channel of SctV-C. Two cross  
1190 sectional protomers were shown in ribbon and surface mode, and coloured as in panel B.  
1191 The entry/exit funnels, the central pore, and the hook-shape region of SctV-C are indicated  
1192 with green arrows.

1193 **D.** Side groove formed by two adjacent protomers of SctV-C. The groove of one protomer  
1194 (shown in ribbon and colored as in panel B) is indicated with a green line. Asterisks indicate  
1195 the entry and exit site.

1196 **E.** Local intrinsic dynamics of SctV-C<sub>9</sub> assessed by HDX-MS. SctV-C<sub>9</sub> indicated views in  
1197 surface representation, colored according to the %D uptake. Differences (D) in %D at 5 min  
1198 are visualized on the structure of SctV-C<sub>9</sub> using a color gradient that correlates with the %  
1199 of D uptake relative to the fully deuterated control (as indicated). Side groove is indicated  
1200 with a green line. Asterisks indicate the entry and exit site. Blue hues: rigid regions; Red  
1201 hues: disordered regions; grey: unidentified. Biological replicates  $n=2$ , Technical replicates  
1202  $n=3$ .

1203 **F.**  $\Delta G_{\text{ex}}$  values (in kJ/mol) were calculated for each residue of SctV-C by PyHDX (51) from  
1204 time-course D-exchange HDX-MS experiments and visualized on the nonameric SctV-C  
1205 protein structure. Residues are colored on a linear scale from grey (33 kJ/mol, rigid) to red  
1206 (19 kJ/mol, dynamic). Highly rigid residues ( $\Delta G_{\text{ex}} > 33$  kJ/mol, transparent grey).

1207 **G.** As in E, SctV-C<sub>9</sub> side view in surface representation, colored according to the %D uptake  
1208 is shown, highlighting flexible regions on one protomer. Charged residues of those regions

1209 that are important for interactors binding are indicated, colored according to the subdomains  
1210 that they belong to.

1211

## 1212 **Fig. 5 Local and domain dynamics in the SctV-C protomer**

1213 **A.** Conformational dynamics of the SctV-C protomer assessed by HDX-MS and colored in a  
1214 ribbon representation (as in Fig. 4E). Tracing lines indicate the respective subdomains,  
1215 colored as in Fig. 4B; Latin numerals indicate important dynamic motions; Secondary  
1216 elements are represented for clarification.

1217 **B.** Conformational dynamics of the SctV-C R535A mutant assessed by HDX-MS and colored  
1218 in a ribbon representation (as in Fig. 4E). %D uptake is shown.

1219 **C.** Differences (D) in %D uptake on mutating residue R535A (which forms monomer) at 5  
1220 min are visualized on the structure of SctV-C9 using a color gradient that correlates with  
1221 the % of D uptake relative to the fully deuterated control (as indicated). Highly flexible  
1222 regions are displayed in green and rigid regions are shown in purple on mutating R535A.

1223 **D.**  $\Delta G_{\text{ex}}$  values were calculated for each residue of SctV-C using PyHDX software (as in Fig.  
1224 4F).  $\Delta G_{\text{ex}}$  values are shown per residue of SctV-C-domain (residues 334-675) and colored  
1225 on a linear scale from grey (33 kJmol<sup>-1</sup>; rigid), to orange (21 kJmol<sup>-1</sup>, flexible) to red (19  
1226 kJmol<sup>-1</sup>; dynamic). Normal modes are calculated using the WebNM@ web serve.  
1227 Displacements per normal mode are then summed with equal weights for the first 6 non-  
1228 trivial normal modes. Normal mode flexibility is derived from normal mode eigenvalues as  
1229 described previously.

1230 **E.** Comparison of SctV-C sub-domains in the three indicated states derived from analysis of  
1231 the 2 PDB structures integrated into a movie (Supplementary methods; Movie S1). The  
1232 EPEC SctV-C structure determined here is that of the “intermediate” state. Important elements  
1233 and arrows showing domain movements are indicated.

1234

1235 **Fig. 6 Chaperone and ATPase inner stalk binding sites on the SctV-C protomer**

1236 **A.** Chaperone and SctO binding domains in the indicated views of the SctV-C<sub>9</sub> surface  
1237 structure at the open (left) and closed (right) state. Chaperone binding sites determined from  
1238 peptide arrays (Fig. S6E,  $\alpha$ ,  $\beta$  and  $\gamma$ ) and NMR analysis (9, 29) are coloured light green in  
1239 two adjacent protomers (dark grey) of the nonamer model. SctO binding sites determined  
1240 from cryoEM analysis (27) are colored cyan. For detailed residues and mutations see Fig.  
1241 S6E and Table S3. Red arrow: crevice between SD2-SD4 revealed by SD2 opening.

1242 **B.** Chaperone binding sites (light green) are shown in the open (top) and closed (bottom)  
1243 state SctV-C of two adjacent protomers (coloured as in Fig. 4B) in a surface  
1244 representation. Red arrow: crevice between SD2-SD4 revealed by SD2 opening.

1245 **C.** SctO binding sites (cyan) from (27) are shown on open (top) and closed (bottom) state  
1246 SctV-C of two adjacent protomers (coloured as in Fig.4B) in a surface representation.

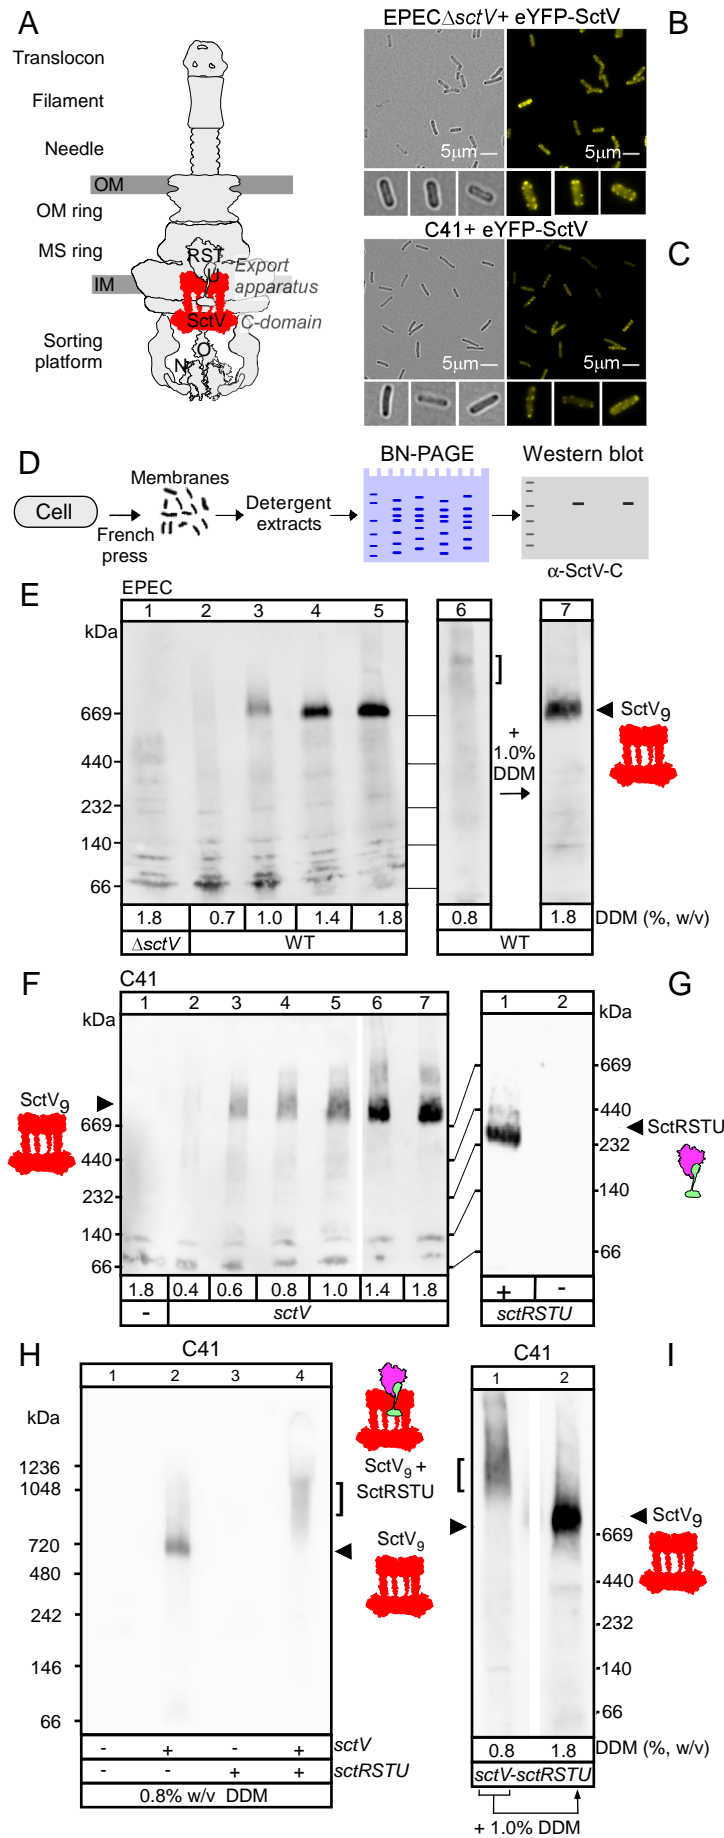

Fig.1 Yuan et al,

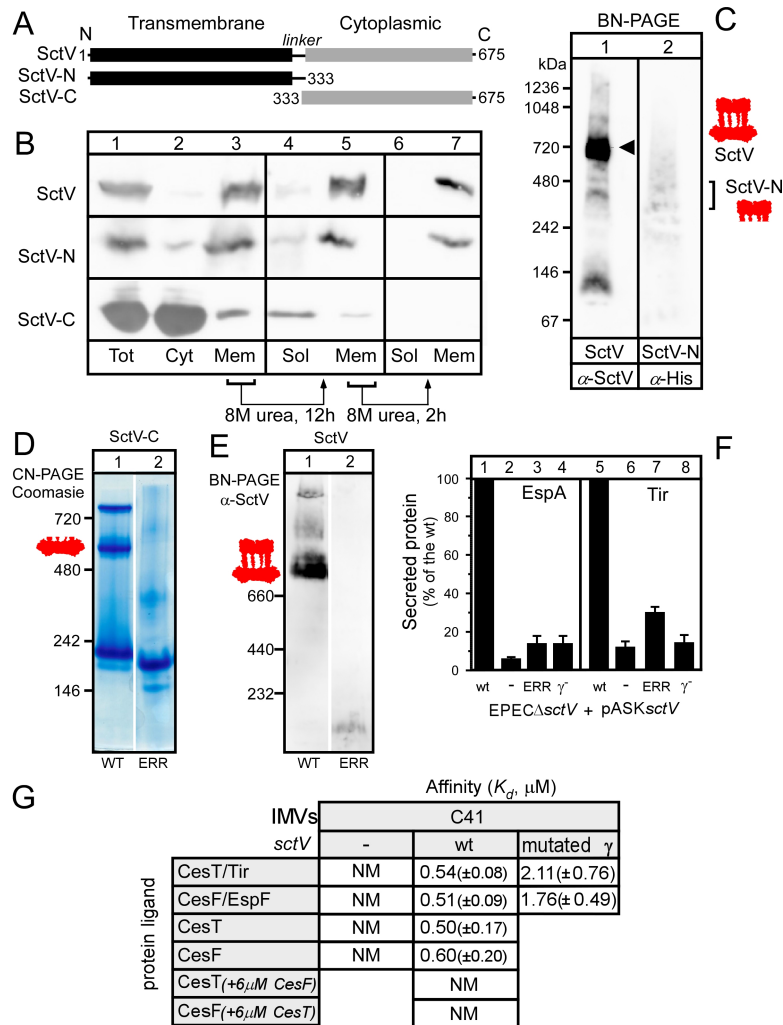

Fig. 2, Yuan et al



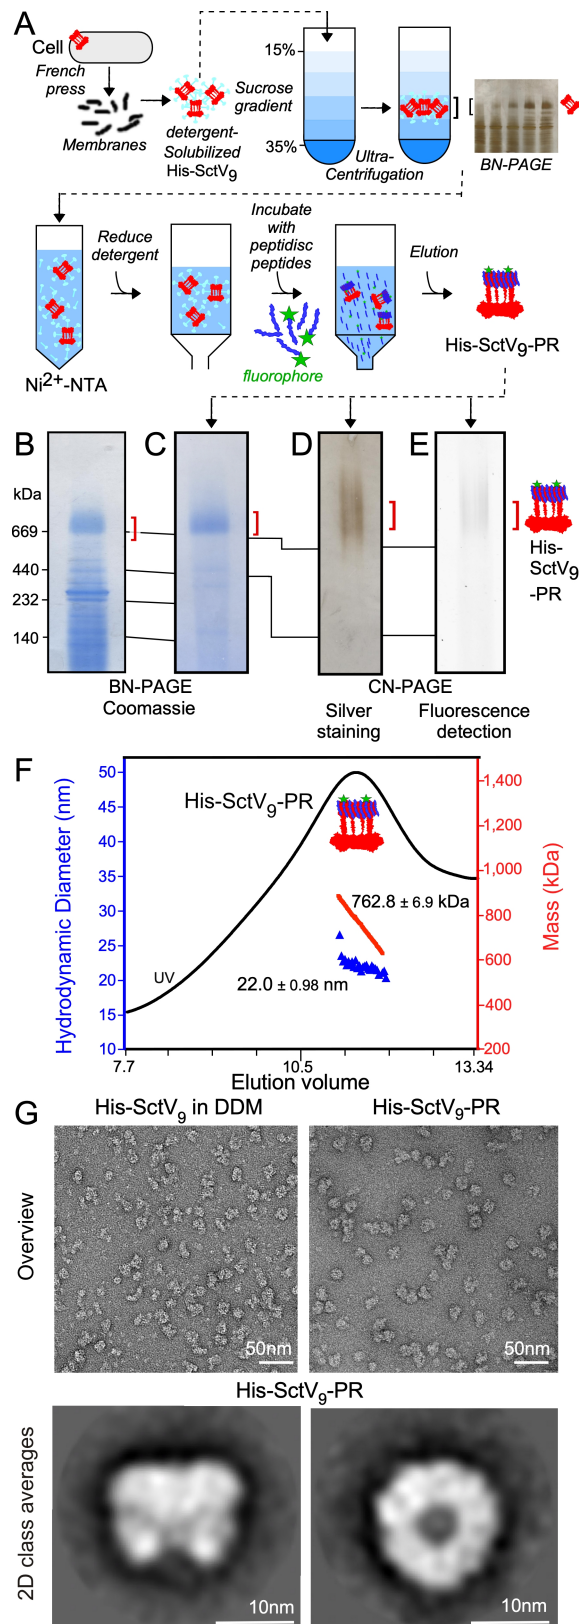

Fig. 3, Yuan et al

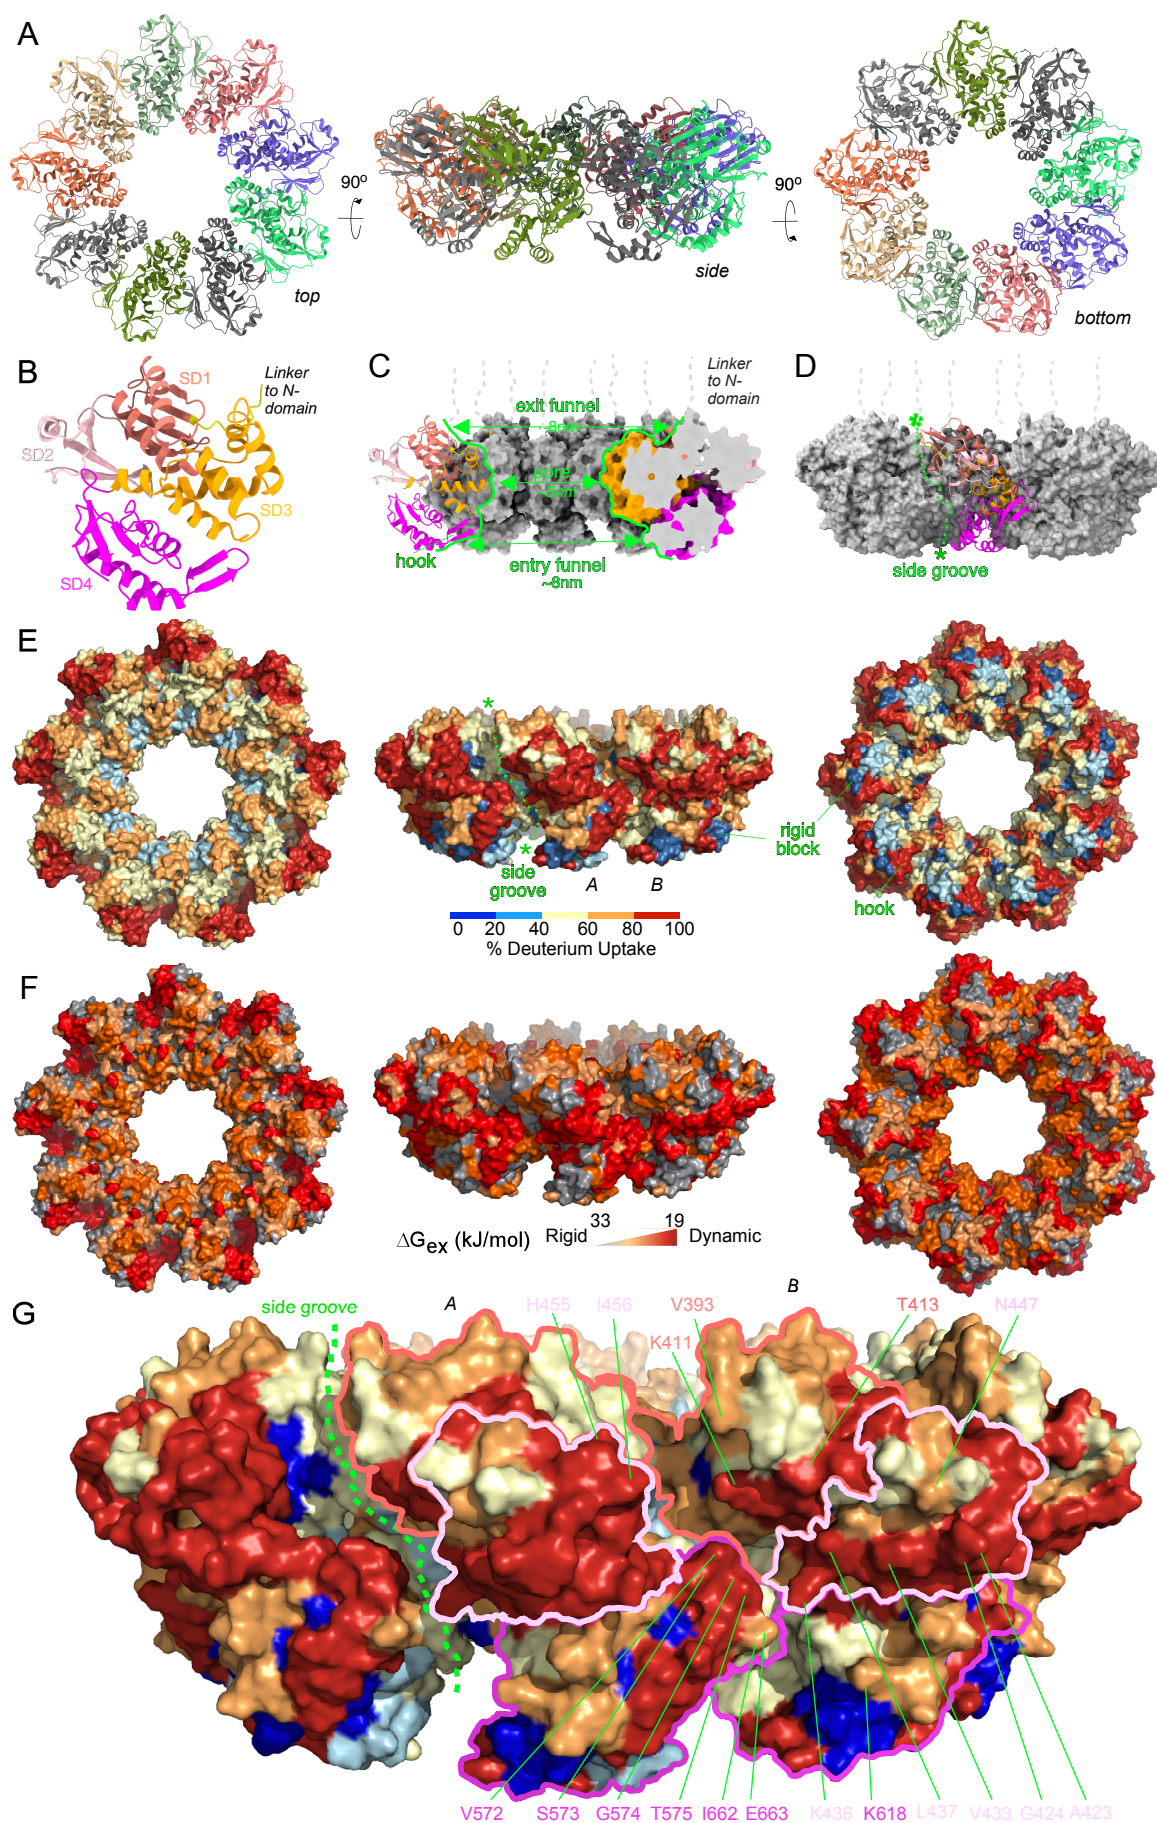

Fig. 4 Yuan et al.

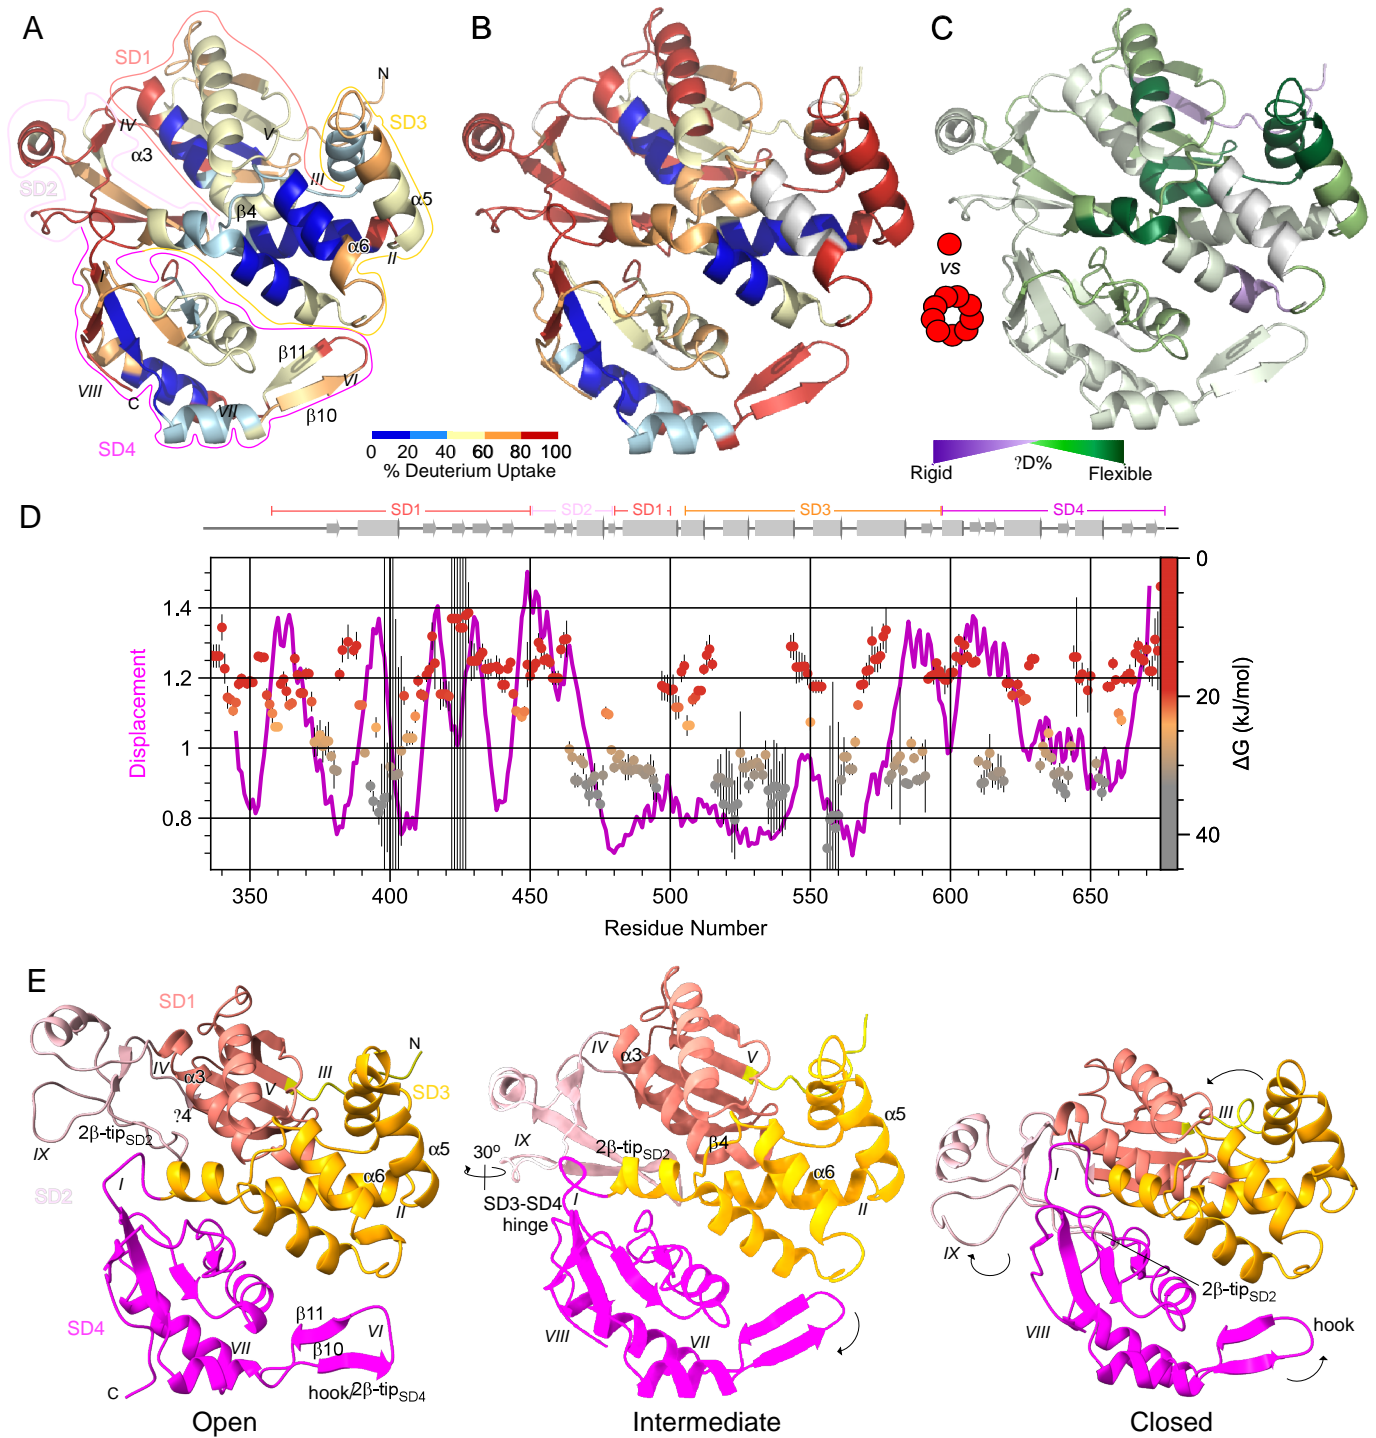

Fig. 5 Yuan et al.

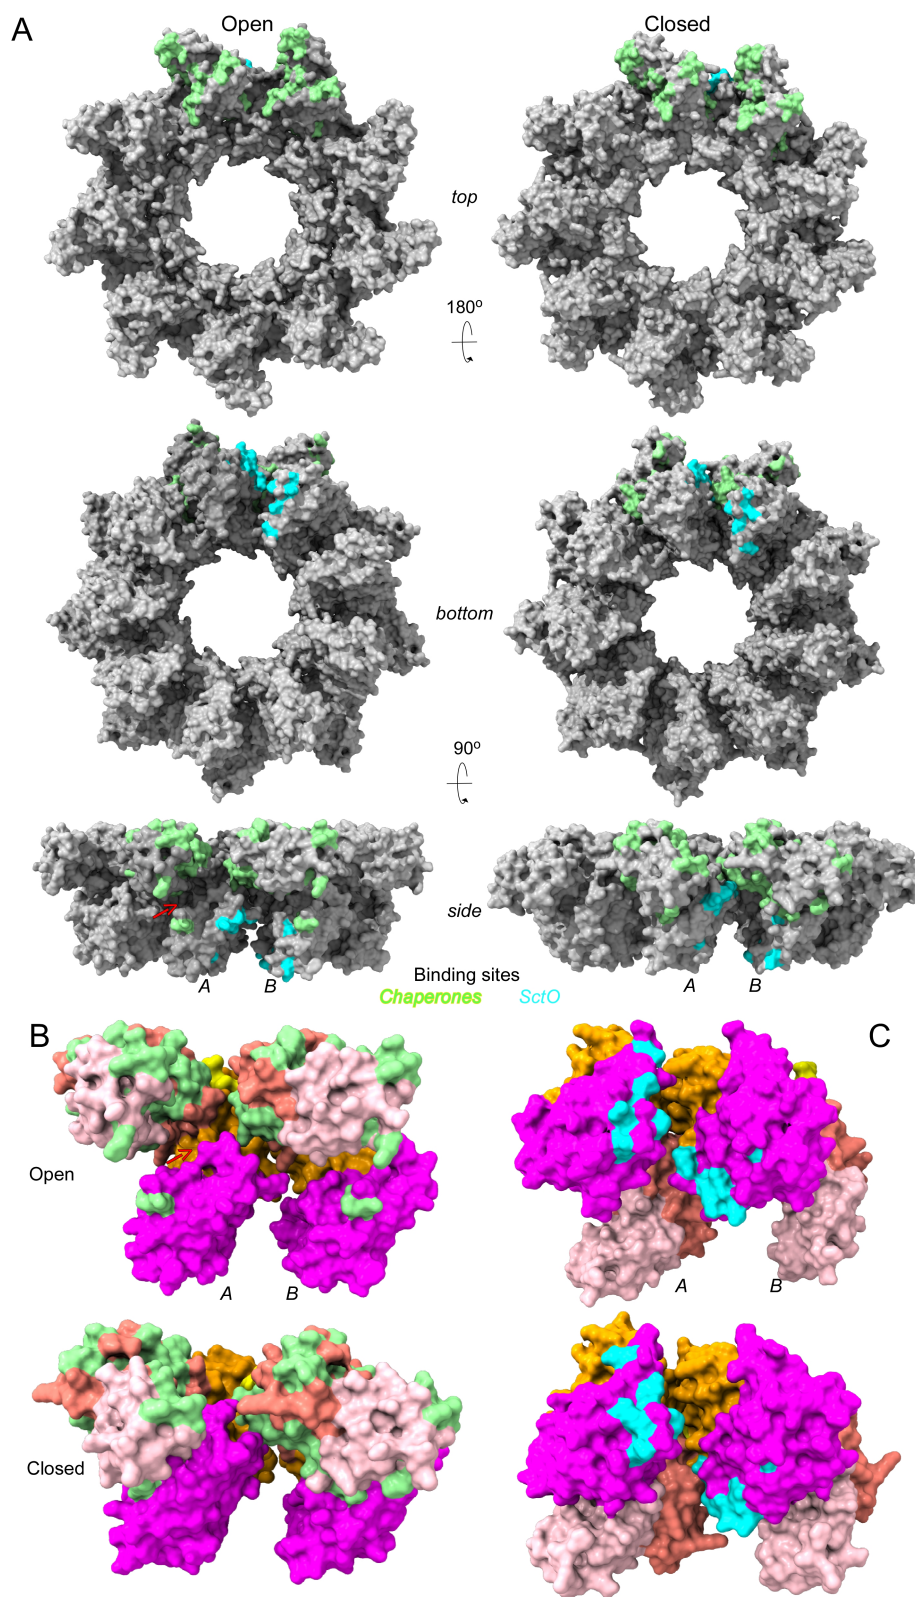

Fig. 6 Yuan et al.
